# Supplementary material
Source: PubMed Central journal article supplement (PMC3356445)

## Synthesis of Phidianidines A and B

Hong-Yu Lin and Barry B. Snider\*

Department of Chemistry MS 015, Brandeis University, Waltham, Massachusetts 02454-9110,

United States

[snider@brandeis.edu](mailto:snider@brandeis.edu)

|                                                                                                   |        |
|---------------------------------------------------------------------------------------------------|--------|
| Explanation of Results from NCI 60 Cell Line Screen.....                                          | S2     |
| 60 Cell Line Screen Results for Phidianidine A ( <b>1a</b> ) .....                                | S3     |
| 60 Cell Line Screen Results for Phidianidine B ( <b>1b</b> ) .....                                | S4     |
| 60 Cell Line Screen Results for Amine <b>12a</b> .....                                            | S5     |
| 60 Cell Line Screen Results for Amine <b>12b</b> .....                                            | S6     |
| Table S1. Comparison of the Spectral Data of Natural and Synthetic Phidianidine A ( <b>1a</b> ).. | S7     |
| Table S2. Comparison of the Spectral Data of Natural and Synthetic Phidianidine B ( <b>1b</b> ).. | S8     |
| Copies of <sup>1</sup> H and <sup>13</sup> C NMR Spectra.....                                     | S9-S30 |

**Interpretation of Data from NCI 60 Cell Screen of Phidianidine A (1a), Phidianidine B (1b), Amine 12a, and Amine 12b.** Compounds submitted to the NCI 60 Cell screen are tested initially at a single high dose ( $10^{-5}$  M) in the full NCI 60 cell panel. The one-dose data are reported as a mean graph of the percent growth of treated cells. The number reported for the one-dose assay is growth relative to the no-drug control, and relative to the time zero number of cells. This allows detection of both growth inhibition (values between 0 and 100) and lethality (values less than 0). For example, a value of 100 means no growth inhibition. A value of 40 means 60% growth inhibition. A value of 0 means no net growth over the course of the experiment. A value of -40 would mean 40% lethality. A value of -100 means all cells are dead

Results for phidianidine A (1a) in 60 cell line screen at 10<sup>-5</sup> M:

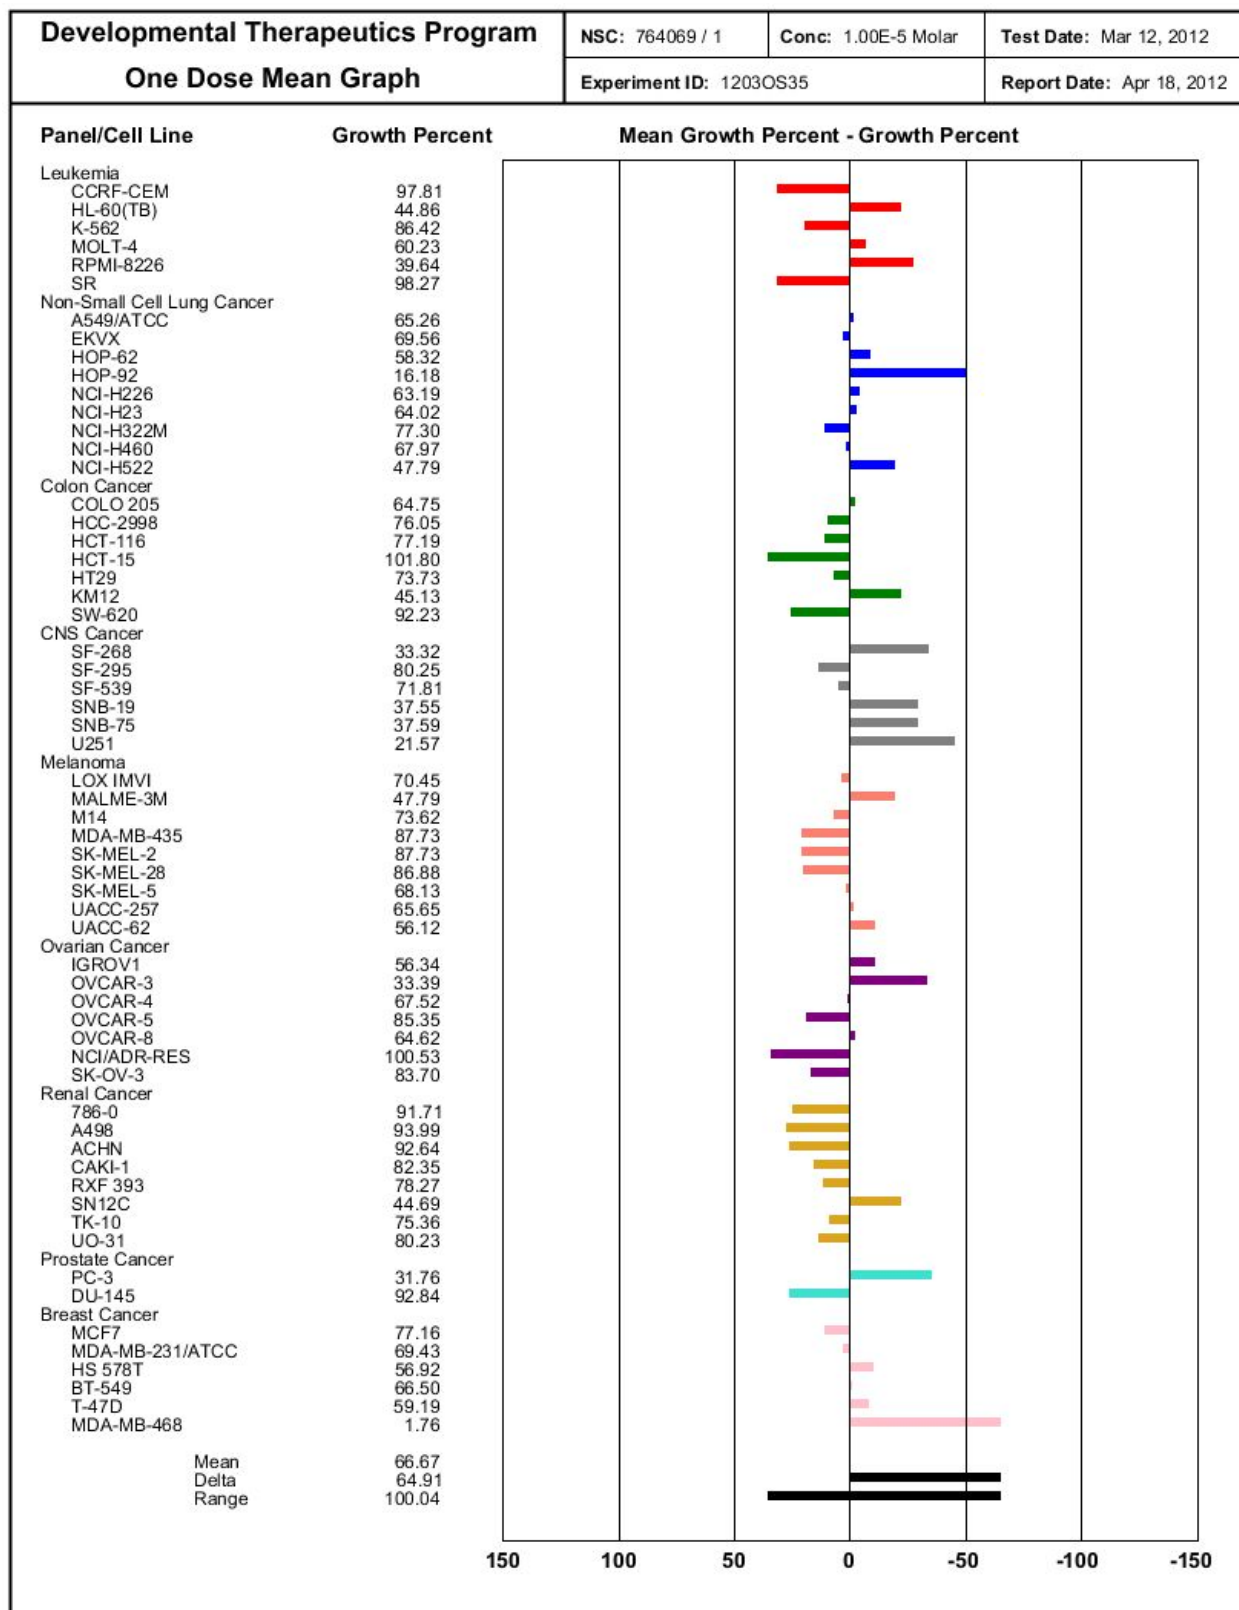

Results for phidianidine B (**1b**) in 60 cell line screen at 10<sup>-5</sup> M:

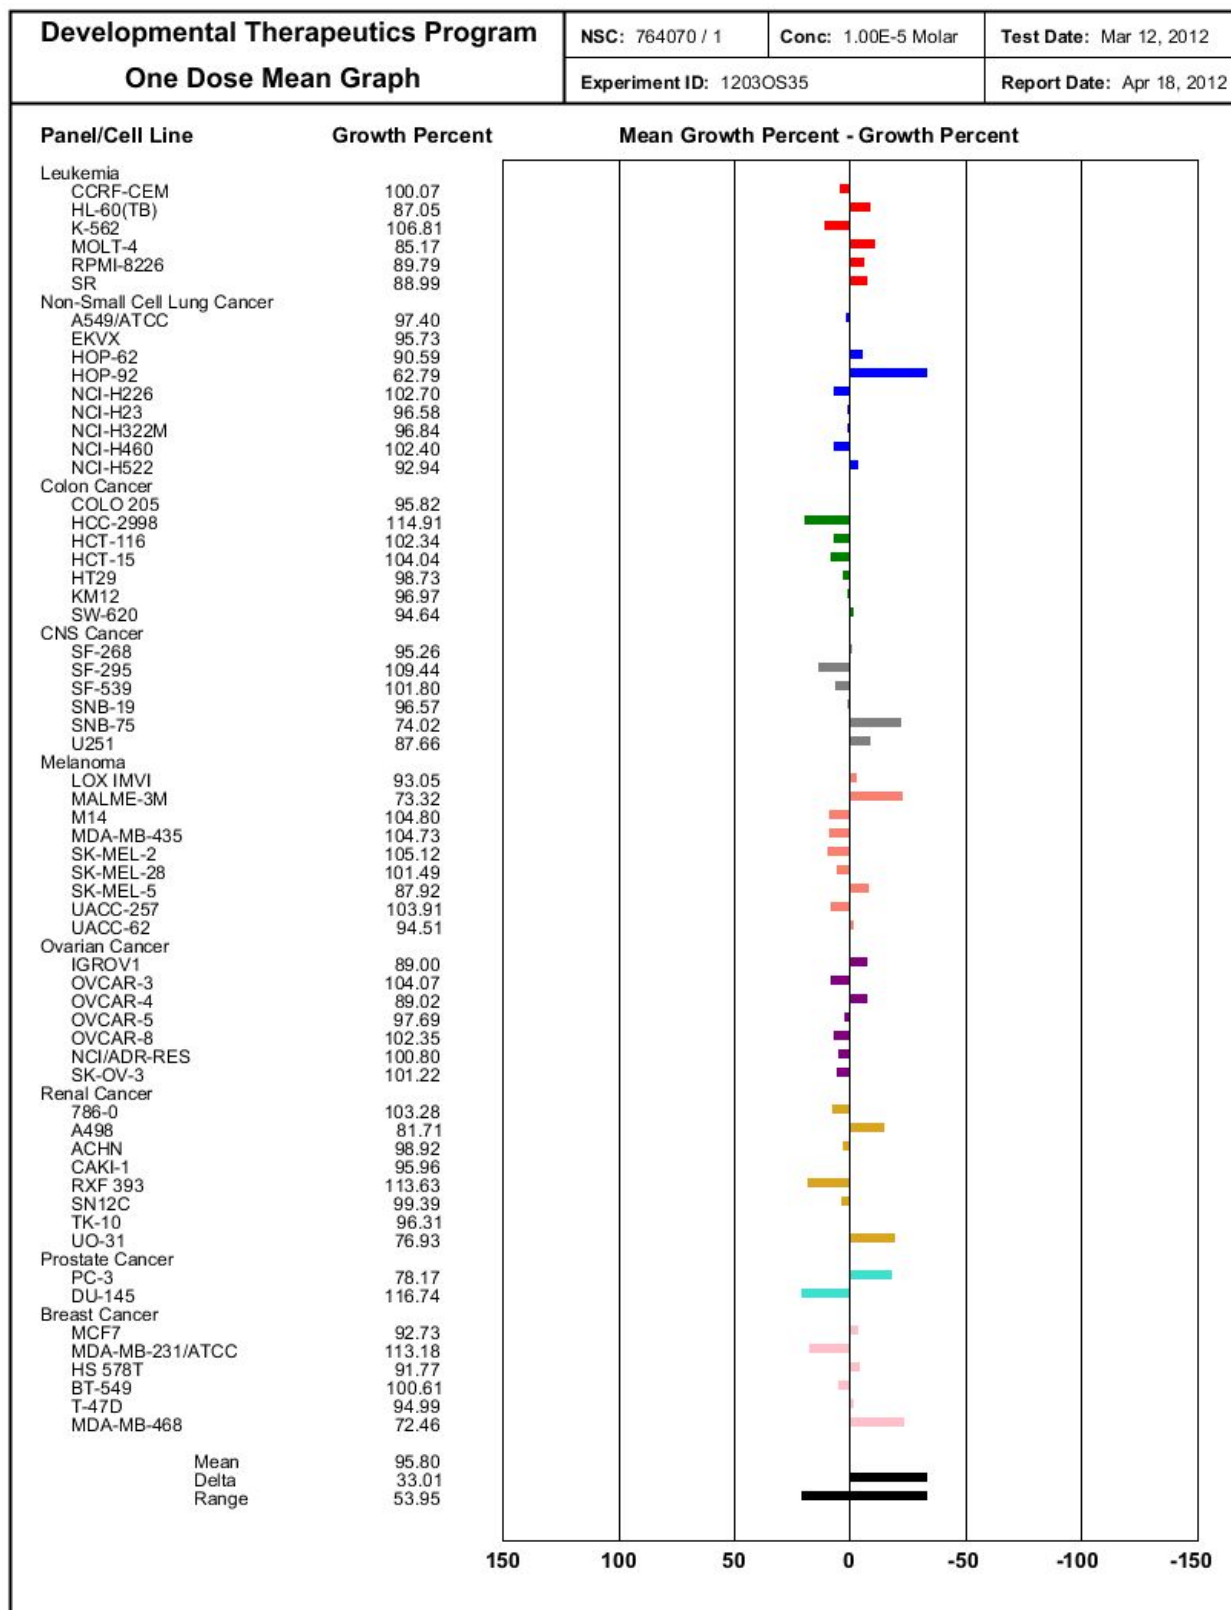

Results for phidianidine A amine precursor **12a** in 60 cell line screen at  $10^{-5}$  M:

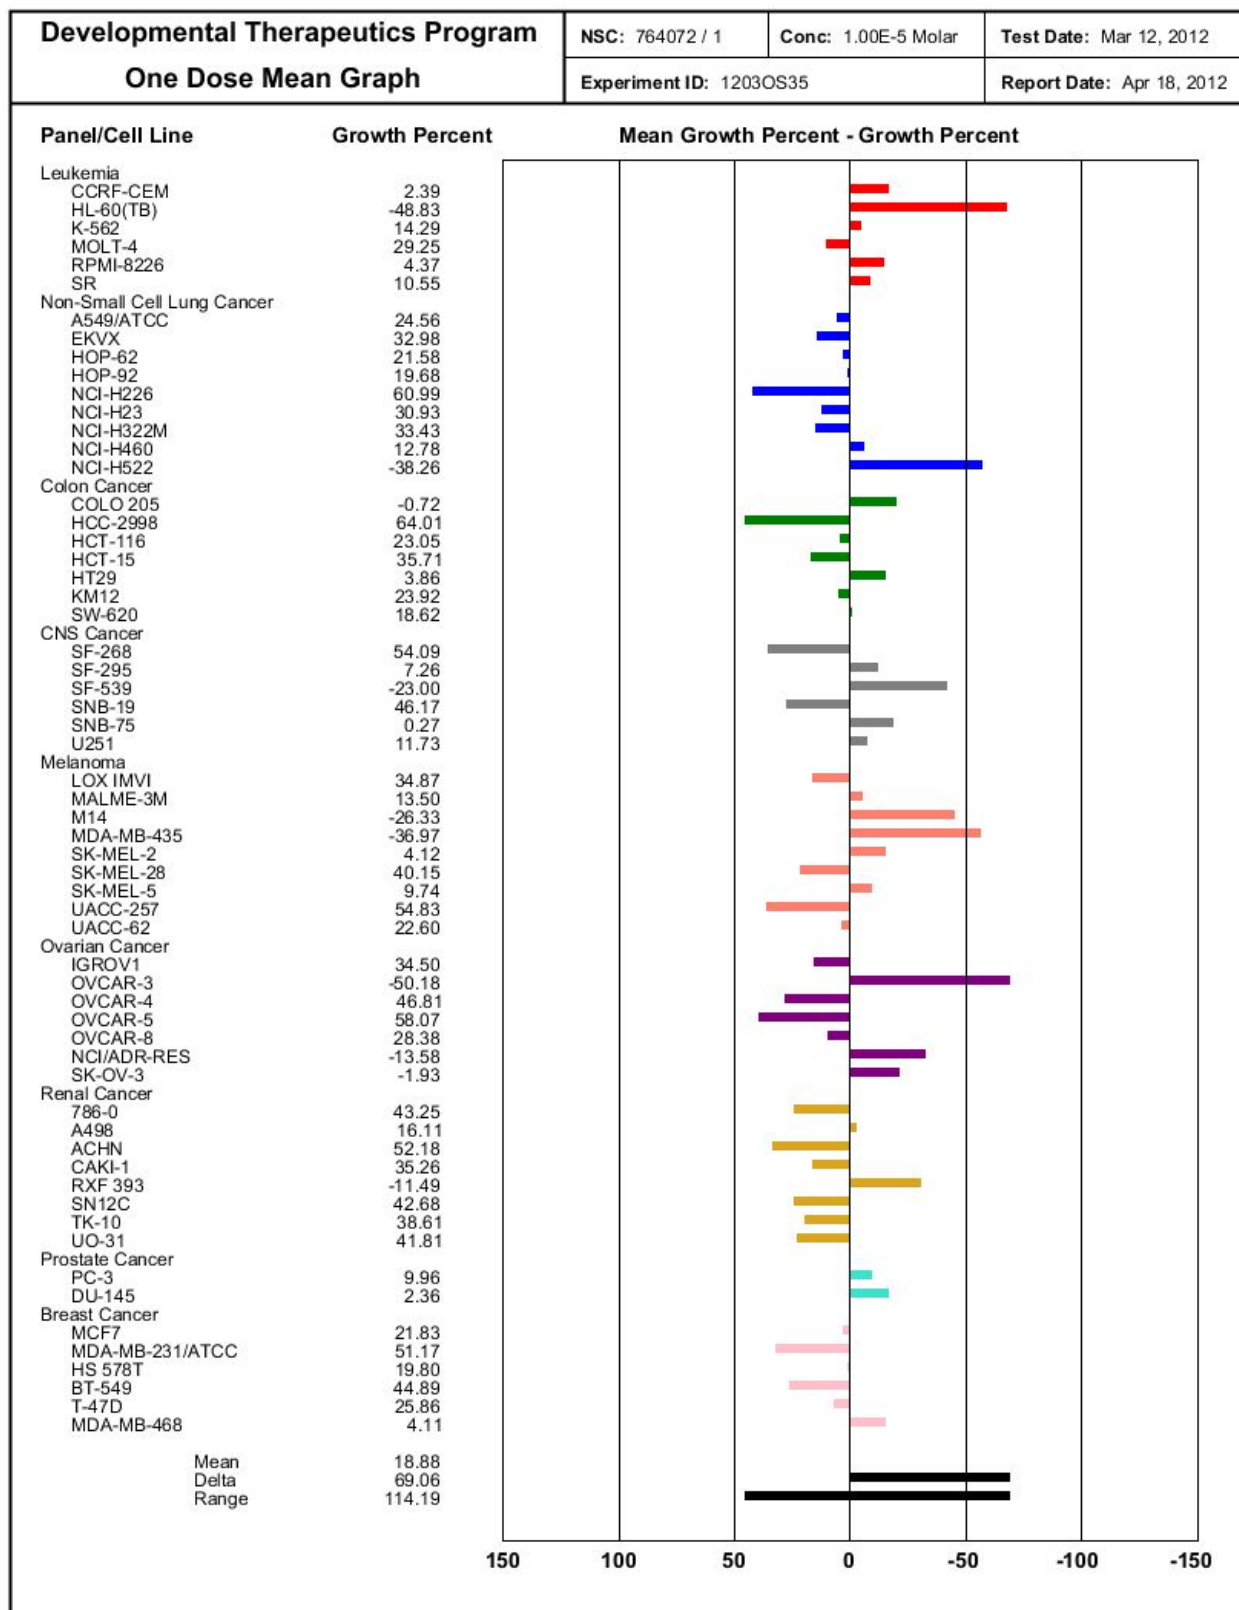

Results for phidianidine B amine precursor **12b** in 60 cell line screen at  $10^{-5}$  M:

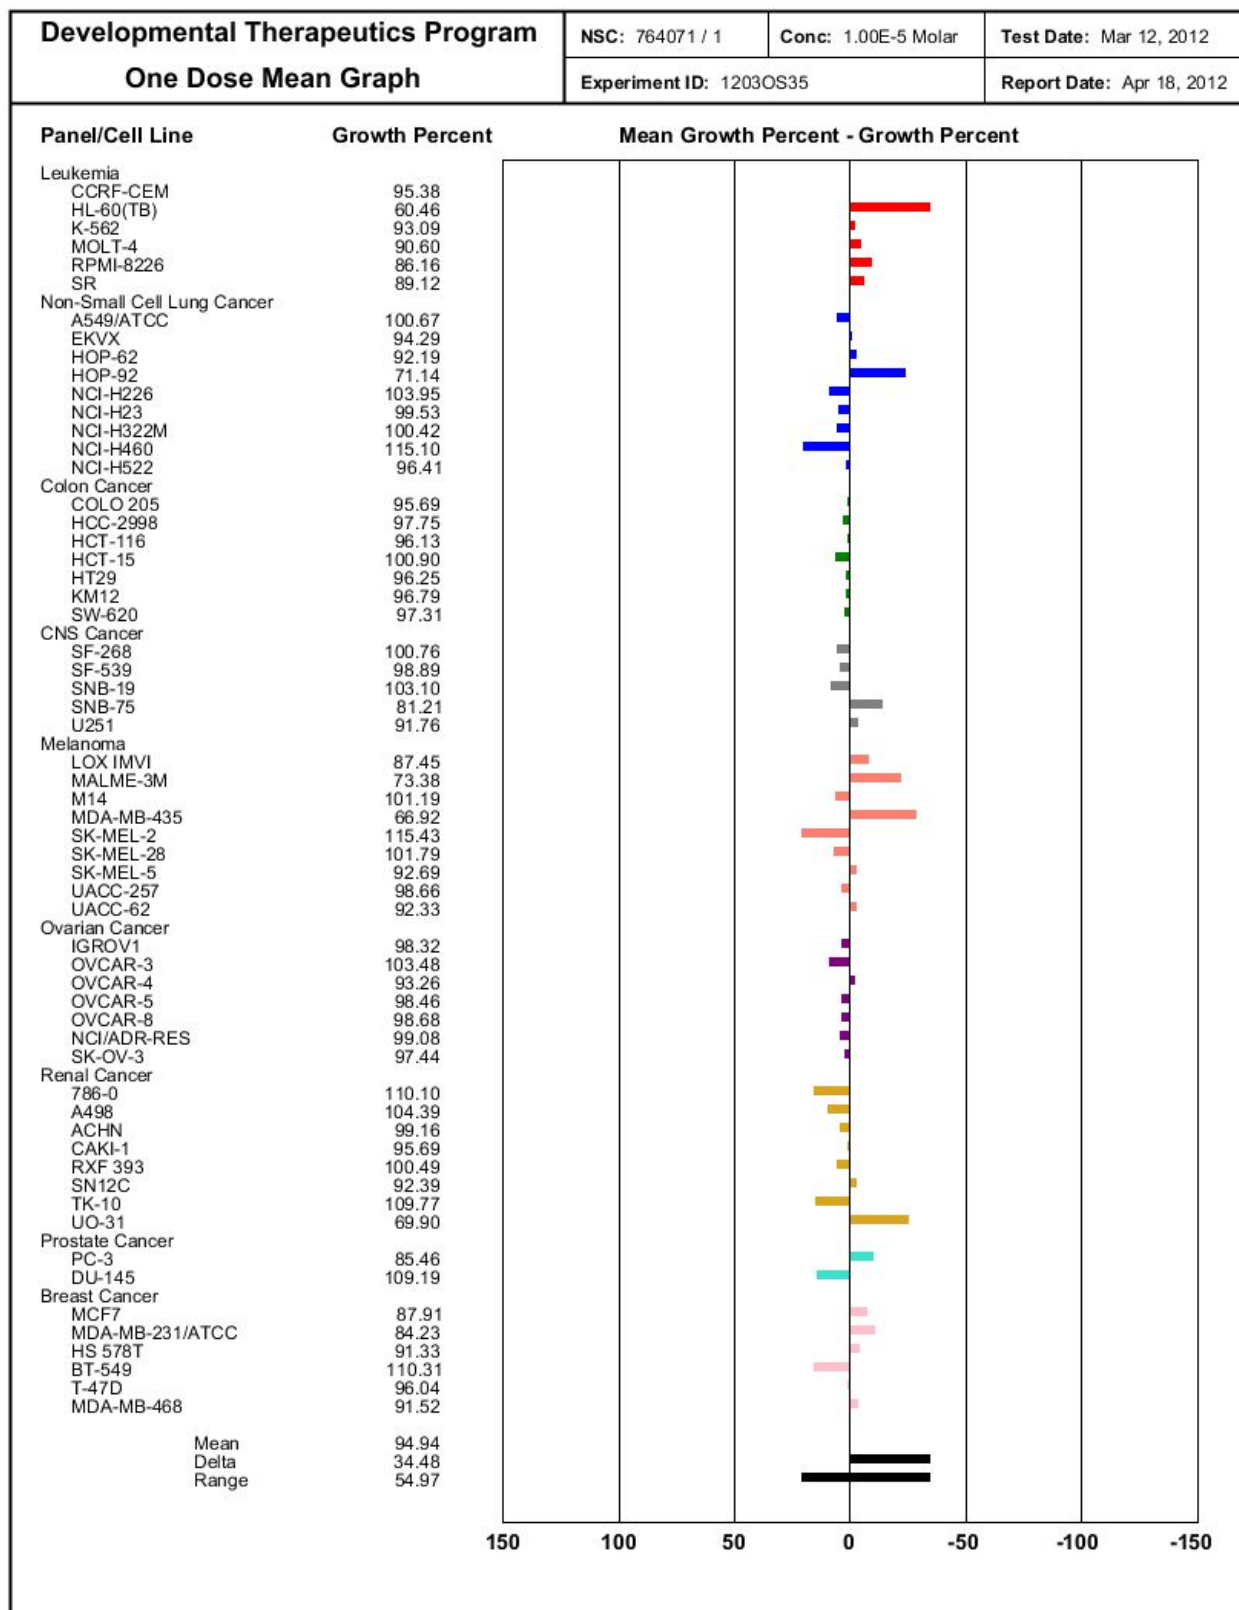

**Table S1.** Comparison of the Spectral Data of Natural and Synthetic Phidianidine A (**1a**). The Numbering Scheme is Shown Below.

| Atom | Natural <sup>a</sup><br>DMSO- <i>d</i> <sub>6</sub><br><sup>13</sup> C NMR | Synthetic<br>DMSO- <i>d</i> <sub>6</sub><br><sup>13</sup> C NMR | Natural <sup>a</sup><br>CD <sub>3</sub> OD<br><sup>13</sup> C NMR | Synthetic<br>CD <sub>3</sub> OD<br><sup>13</sup> C NMR | Natural <sup>a</sup><br>DMSO- <i>d</i> <sub>6</sub><br><sup>1</sup> H NMR | Synthetic<br>DMSO- <i>d</i> <sub>6</sub><br><sup>1</sup> H NMR | Natural <sup>a</sup><br>CD <sub>3</sub> OD<br><sup>1</sup> H NMR | Synthetic<br>CD <sub>3</sub> OD<br><sup>1</sup> H NMR |
|------|----------------------------------------------------------------------------|-----------------------------------------------------------------|-------------------------------------------------------------------|--------------------------------------------------------|---------------------------------------------------------------------------|----------------------------------------------------------------|------------------------------------------------------------------|-------------------------------------------------------|
| 1    | ---                                                                        | ---                                                             | ---                                                               | ---                                                    | 11.15                                                                     | 11.18                                                          | ---                                                              | ---                                                   |
| 2    | 125.0                                                                      | 125.3                                                           | 124.4 <sup>b</sup>                                                | 125.9                                                  | 7.35                                                                      | 7.35                                                           | 7.27                                                             | 7.23                                                  |
| 3    | 106.8 <sup>b</sup>                                                         | 107.4                                                           | 108.4                                                             | 108.8                                                  | ---                                                                       | ---                                                            | ---                                                              | ---                                                   |
| 3a   | 125.2                                                                      | 125.8                                                           | 126.6                                                             | 127.3                                                  | ---                                                                       | ---                                                            | ---                                                              | ---                                                   |
| 4    | 120.0                                                                      | 120.2                                                           | 121.1                                                             | 121.0                                                  | 7.46 (d, 8)                                                               | 7.47 (d, 8)                                                    | 7.48 (d, 8)                                                      | 7.45 (d, 8)                                           |
| 5    | 121.3                                                                      | 121.6                                                           | 122.4 <sup>b</sup>                                                | 123.4                                                  | 7.13 (dd, 8, 1)                                                           | 7.14 (dd, 8, 1)                                                | 7.16 (dd, 8, 1)                                                  | 7.13 (dd, 8, 1)                                       |
| 6    | 113.5 <sup>c</sup>                                                         | 114.0                                                           | 115.1                                                             | 115.5                                                  | ---                                                                       | ---                                                            | ---                                                              | ---                                                   |
| 7    | 114.1                                                                      | 114.2                                                           | 115.8                                                             | 116.3                                                  | 7.56 (d, 1)                                                               | 7.56 (d, 1)                                                    | 7.55 (d, 1)                                                      | 7.52 (d, 1)                                           |
| 7a   | 137.0                                                                      | 137.0                                                           | 138.6                                                             | 139.1                                                  | ---                                                                       | ---                                                            | ---                                                              | ---                                                   |
| 8    | 22.5                                                                       | 22.5                                                            | 23.8                                                              | 24.1                                                   | 4.20 (s)                                                                  | 4.20                                                           | 4.23                                                             | 4.20                                                  |
| 3'   | 168.5                                                                      | 168.5                                                           | 169.0 <sup>c</sup>                                                | 170.3                                                  | ---                                                                       | ---                                                            | ---                                                              | ---                                                   |
| 5'   | 176.7                                                                      | 176.7                                                           | 179.9 <sup>b</sup>                                                | 179.1                                                  | ---                                                                       | ---                                                            | ---                                                              | ---                                                   |
| 1''  | ---                                                                        | ---                                                             | ---                                                               | ---                                                    | 6.72                                                                      | 6.73                                                           | ---                                                              | ---                                                   |
| 2''  | 40.5                                                                       | 40.7                                                            | 43.0 <sup>b</sup>                                                 | 42.5                                                   | 2.99                                                                      | 3.00                                                           | 3.16                                                             | 3.15                                                  |
| 3''  | 28.1                                                                       | 28.1                                                            | 29.5                                                              | 29.7                                                   | 1.36-1.56                                                                 | 1.42-1.56                                                      | 1.62                                                             | 1.66-1.54                                             |
| 4''  | 23.4                                                                       | 23.3                                                            | 24.5                                                              | 25.1                                                   | 1.28                                                                      | 1.22-1.34                                                      | 1.44                                                             | 1.46-1.36                                             |
| 5''  | 28.1                                                                       | 28.1                                                            | 29.7                                                              | 29.9                                                   | 1.36-1.56                                                                 | 1.42-1.56                                                      | 1.62                                                             | 1.66-1.54                                             |
| 6''  | 41.9 <sup>b</sup>                                                          | 42.3                                                            | 43.5 <sup>b</sup>                                                 | 43.9                                                   | 3.02                                                                      | 3.06                                                           | 3.18                                                             | 3.15                                                  |
| 7''  | ---                                                                        | ---                                                             | ---                                                               | ---                                                    | 7.41                                                                      | 7.49                                                           | ---                                                              | ---                                                   |
| 8''  | 156.6                                                                      | 156.7                                                           | 158.6                                                             | 158.8                                                  | ---                                                                       | ---                                                            | ---                                                              | ---                                                   |

<sup>(a)</sup>Data taken from reference 1. <sup>(b)</sup>The reported data in reference 1 are not consistent with the spectrum provided in the supporting material. <sup>(c)</sup>This peak does not appear in the <sup>13</sup>C NMR spectrum and was determined less accurately from the HMBC spectrum.

**Table S2.** Comparison of the Spectral Data of Natural and Synthetic Phidianidine B (**1b**). The Numbering Scheme is Shown Below.
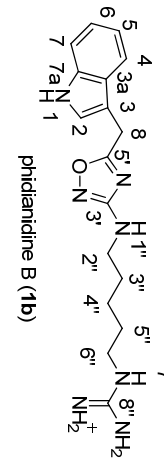

| Atom | Natural <sup>a</sup><br>DMSO- <i>d</i> <sub>6</sub><br><sup>13</sup> C NMR | Synthetic<br>DMSO- <i>d</i> <sub>6</sub><br><sup>13</sup> C NMR | Natural <sup>a</sup><br>CD <sub>3</sub> OD<br><sup>13</sup> C NMR | Synthetic<br>CD <sub>3</sub> OD<br><sup>13</sup> C NMR | Natural <sup>a</sup><br>DMSO- <i>d</i> <sub>6</sub><br><sup>1</sup> H NMR | Synthetic<br>DMSO- <i>d</i> <sub>6</sub><br><sup>1</sup> H NMR | Natural <sup>a</sup><br>CD <sub>3</sub> OD<br><sup>1</sup> H NMR | Synthetic<br>CD <sub>3</sub> OD<br><sup>1</sup> H NMR |
|------|----------------------------------------------------------------------------|-----------------------------------------------------------------|-------------------------------------------------------------------|--------------------------------------------------------|---------------------------------------------------------------------------|----------------------------------------------------------------|------------------------------------------------------------------|-------------------------------------------------------|
| 1    | ---                                                                        | ---                                                             | ---                                                               | ---                                                    | 11.00                                                                     | 11.04                                                          | ---                                                              | ---                                                   |
| 2    | 125.3 <sup>b</sup>                                                         | 124.2                                                           | 124.4                                                             | 124.8                                                  | 7.31                                                                      | 7.31                                                           | 7.28 <sup>b</sup>                                                | 7.21                                                  |
| 3    | 106.9                                                                      | 106.9                                                           | 107.9                                                             | 108.3                                                  | ---                                                                       | ---                                                            | ---                                                              | ---                                                   |
| 3a   | 126.7                                                                      | 126.7                                                           | 127.9                                                             | 128.3                                                  | ---                                                                       | ---                                                            | ---                                                              | ---                                                   |
| 4    | 118.3                                                                      | 118.4                                                           | 118.9                                                             | 119.4                                                  | 7.50 (d, 8)                                                               | 7.51 (d, 8)                                                    | 7.38 (d, 8)                                                      | 7.35 (d, 8)                                           |
| 5    | 118.6                                                                      | 118.7                                                           | 119.6                                                             | 120.2                                                  | 6.99 (dd, 8, 8)                                                           | 6.99 (dd, 8, 8)                                                | 7.04 (dd, 8, 8)                                                  | 7.01 (dd, 8, 8)                                       |
| 6    | 120.2 <sup>b</sup>                                                         | 121.2                                                           | 122.4                                                             | 122.9                                                  | 7.09 (dd, 8, 8)                                                           | 7.09 (dd, 8, 8)                                                | 7.14 (dd, 8, 8)                                                  | 7.11 (dd, 8, 8)                                       |
| 7    | 111.5                                                                      | 111.5                                                           | 112.1                                                             | 112.5                                                  | 7.36 (d, 8)                                                               | 7.37 (d, 8)                                                    | 7.57 (d, 8)                                                      | 7.52 (d, 8)                                           |
| 7a   | 136.1                                                                      | 136.2                                                           | 137.6                                                             | 138.2                                                  | ---                                                                       | ---                                                            | ---                                                              | ---                                                   |
| 8    | 22.7                                                                       | 22.7                                                            | 23.8                                                              | 24.2                                                   | 4.20 (s)                                                                  | 4.20                                                           | 4.23                                                             | 4.22                                                  |
| 3'   | 168.5                                                                      | 168.5                                                           | 169.9                                                             | 170.2                                                  | ---                                                                       | ---                                                            | ---                                                              | ---                                                   |
| 5'   | 176.9                                                                      | 176.9                                                           | 179.0                                                             | 179.5                                                  | ---                                                                       | ---                                                            | ---                                                              | ---                                                   |
| 1''  | ---                                                                        | ---                                                             | ---                                                               | ---                                                    | 6.71 (t, 5)                                                               | 6.72 (t, 5)                                                    | ---                                                              | ---                                                   |
| 2''  | 40.7                                                                       | 40.7                                                            | 43.0 <sup>b</sup>                                                 | 42.5                                                   | 3.00                                                                      | 3.01                                                           | 3.16                                                             | 3.14                                                  |
| 3''  | 28.1                                                                       | 28.1                                                            | 29.1 <sup>b</sup>                                                 | 29.7                                                   | 1.36-1.56                                                                 | 1.40-.156                                                      | 1.62                                                             | 1.68-1.54                                             |
| 4''  | 23.4                                                                       | 23.4                                                            | 24.8                                                              | 25.0                                                   | 1.28                                                                      | 1.25-1.35                                                      | 1.44                                                             | 1.46-1.36                                             |
| 5''  | 28.1                                                                       | 28.1                                                            | 29.1 <sup>b</sup>                                                 | 29.9                                                   | 1.36-1.56                                                                 | 1.42-1.56                                                      | 1.62                                                             | 1.68-1.54                                             |
| 6''  | 42.3                                                                       | 42.3                                                            | 43.5 <sup>b</sup>                                                 | 43.9                                                   | 3.05                                                                      | 3.06                                                           | 3.18                                                             | 3.15                                                  |
| 7''  | ---                                                                        | ---                                                             | ---                                                               | ---                                                    | 7.43                                                                      | 7.55                                                           | ---                                                              | ---                                                   |
| 8''  | 156.6                                                                      | 156.7                                                           | 158.6                                                             | 158.8                                                  | ---                                                                       | ---                                                            | ---                                                              | ---                                                   |

<sup>(a)</sup>Data taken from reference 1. <sup>(b)</sup>The reported data in reference 1 are not consistent with the spectrum provided in the supporting material.



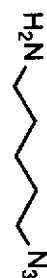

6

CDCl<sub>3</sub>, 400 MHz

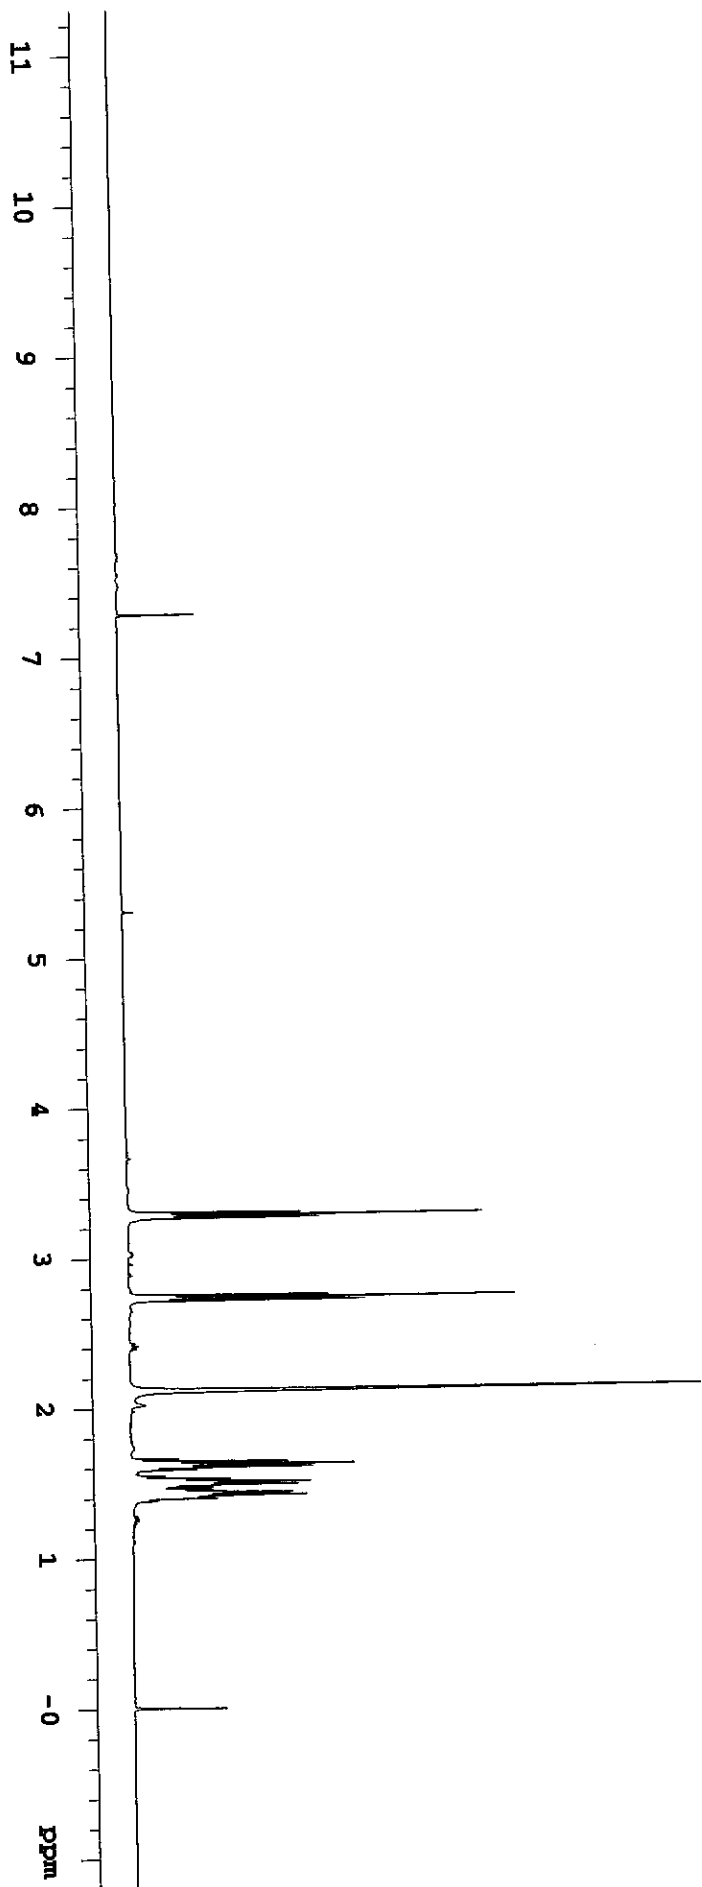

| INDEX | FREQUENCY | PPM    | HEIGHT |
|-------|-----------|--------|--------|
| 1     | 7772.129  | 77.314 | 152.7  |
| 2     | 7740.085  | 76.996 | 162.0  |
| 3     | 7708.040  | 76.677 | 156.6  |
| 4     | 5155.167  | 51.282 | 115.4  |
| 5     | 4193.834  | 41.719 | 125.5  |
| 6     | 3384.382  | 32.672 | 114.2  |
| 7     | 2876.197  | 28.611 | 120.2  |
| 8     | 2407.738  | 23.951 | 132.3  |

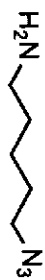

6

CDCl<sub>3</sub>, 100 MHz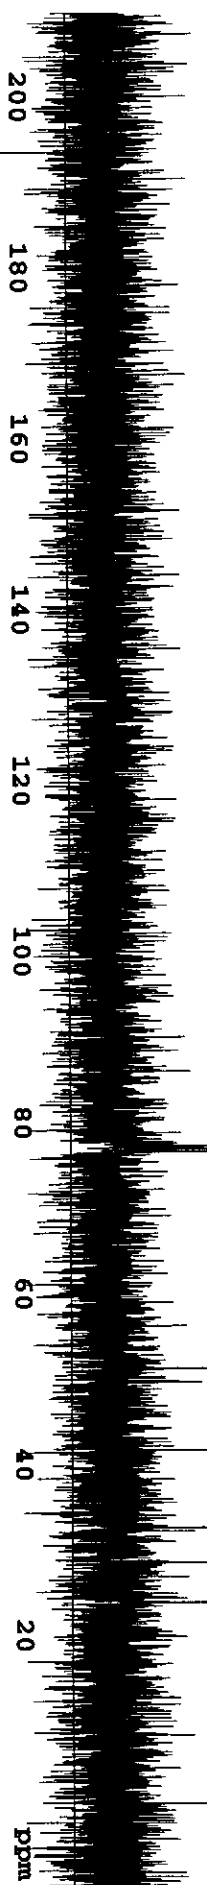

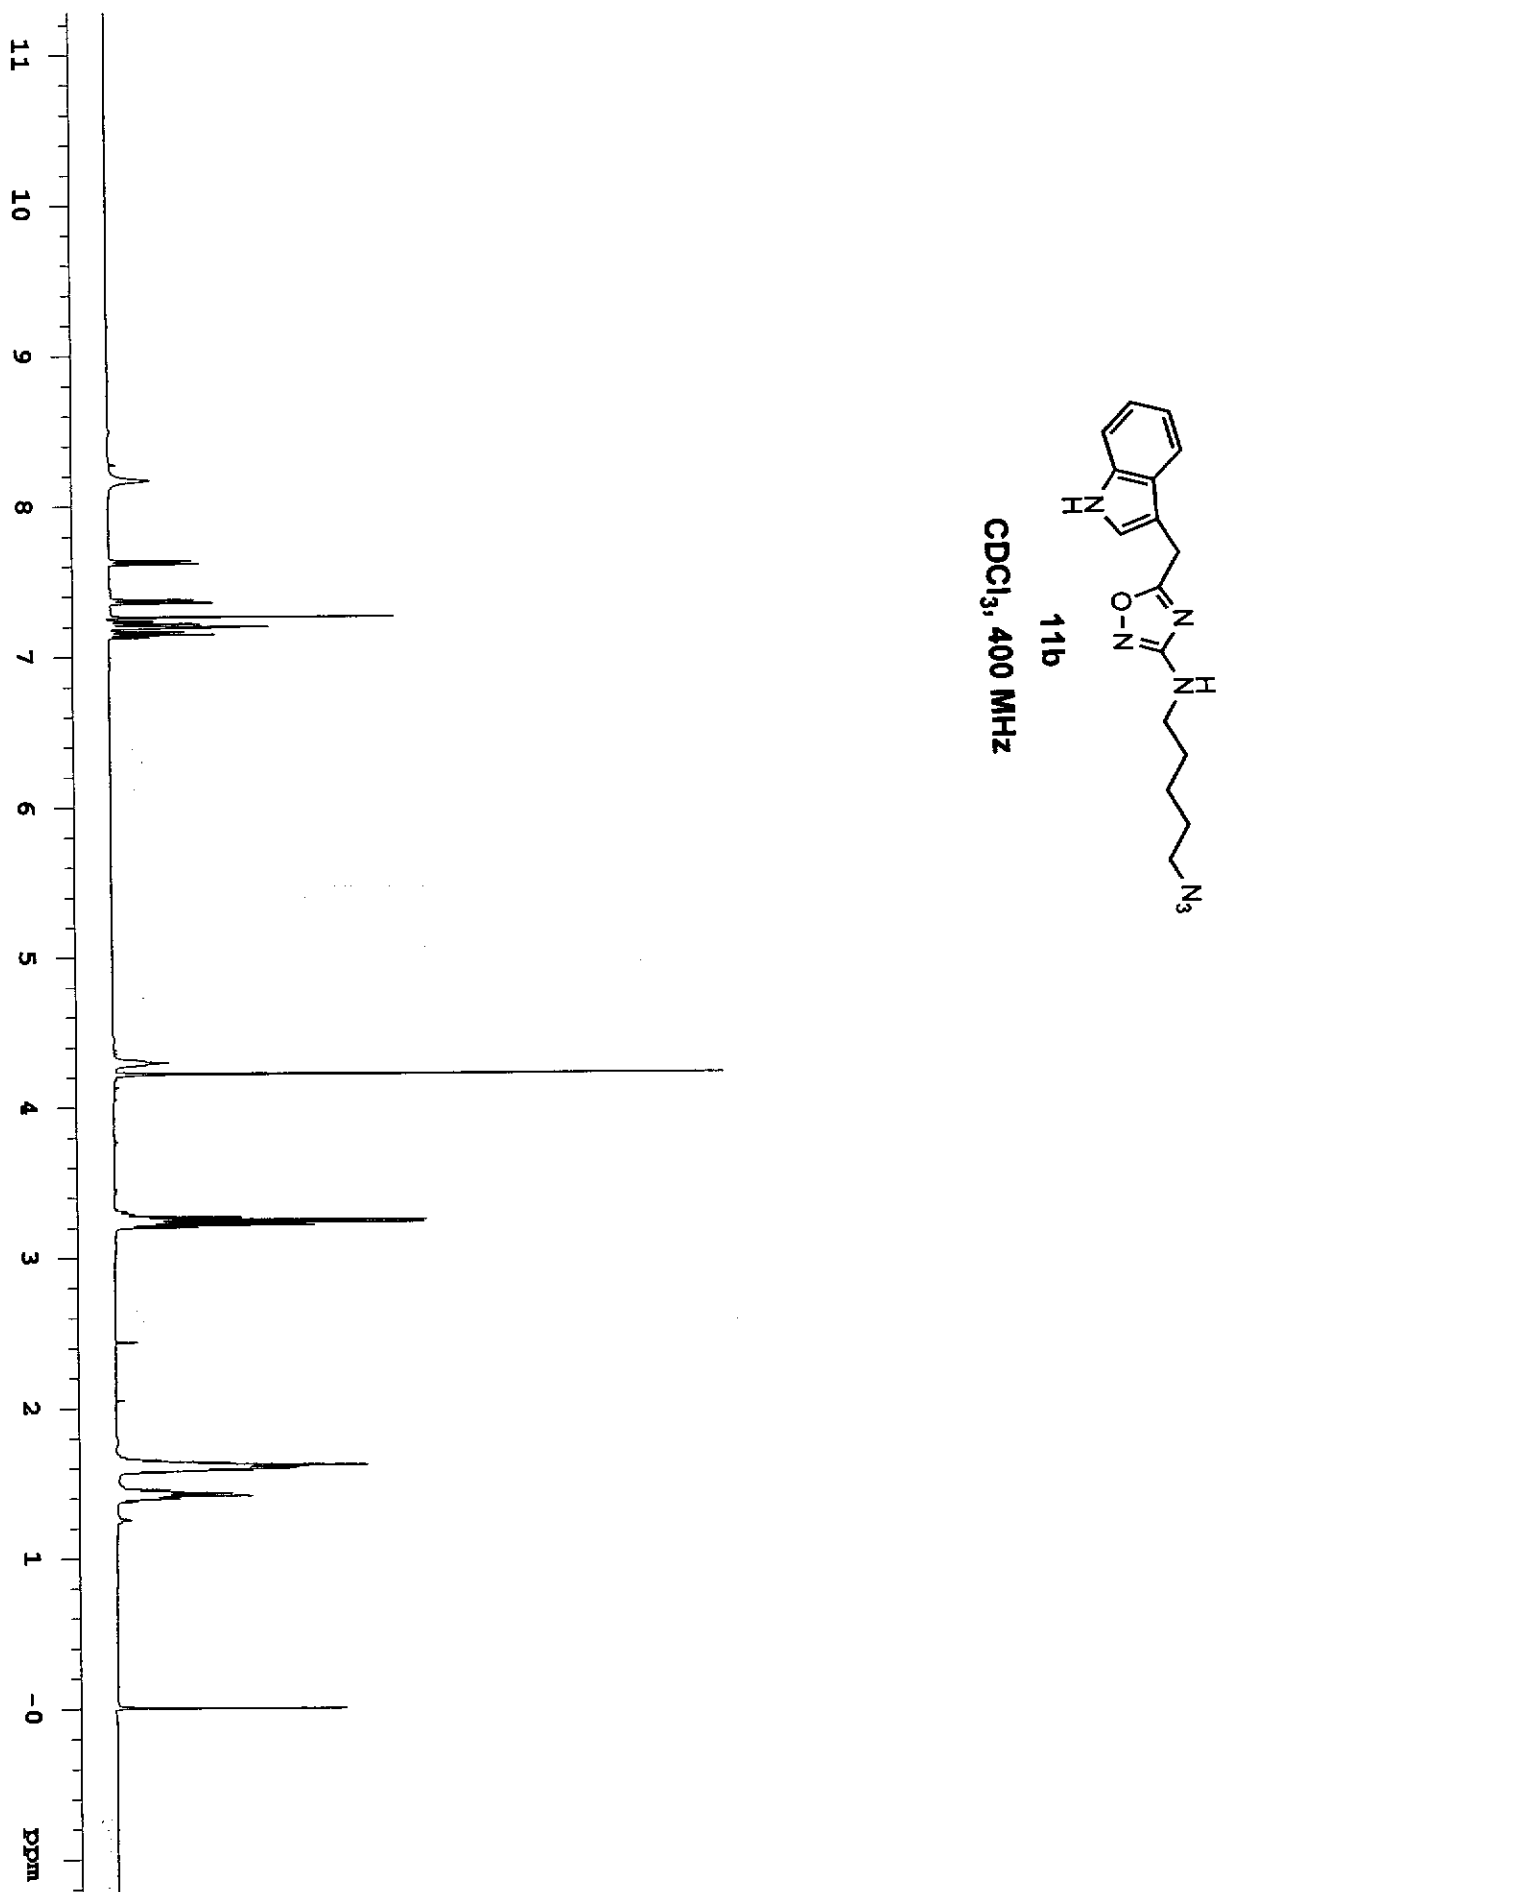

| INDEX | FREQUENCY | PPM     | HEIGHT     |
|-------|-----------|---------|------------|
| 1     | 17819.585 | 177.263 | 18.3       |
| 2     | 16954.385 | 168.656 | 8.3        |
| 3     | 13682.038 | 136.104 | 8.2        |
| 4     | 12740.542 | 126.738 | 11.1       |
| 5     | 12364.402 | 122.997 | 30.2       |
| 6     | 12313.283 | 122.488 | 40.5       |
| 7     | 12054.639 | 119.915 | 33.3       |
| 8     | 11934.091 | 118.716 | 42.6       |
| 9     | 11184.861 | 111.263 | 45.1       |
| 10    | 10868.232 | 108.113 | 14.0       |
| 11    | 7772.129  | 77.314  | 198.5      |
| 12    | 7740.084  | 76.996  | 200.0      |
| 13    | 7708.803  | 76.684  | 189.1      |
| 14    | 5149.826  | 51.229  | 37.4       |
| 15    | 4331.930  | 43.093  | 40.6       |
| 16    | 2904.427  | 28.892  | 47.6       |
| 17    | 2861.701  | 28.467  | 38.6       |
| 18    | 2401.634  | 23.891  | 45.7       |
| 19    | 2355.093  | 23.428  | 48.4       |
| 20    | -2.461    | -0.024  | 12.9 ~ TMS |

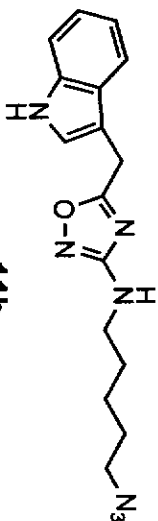

11b

CDCl<sub>3</sub>, 100 MHz

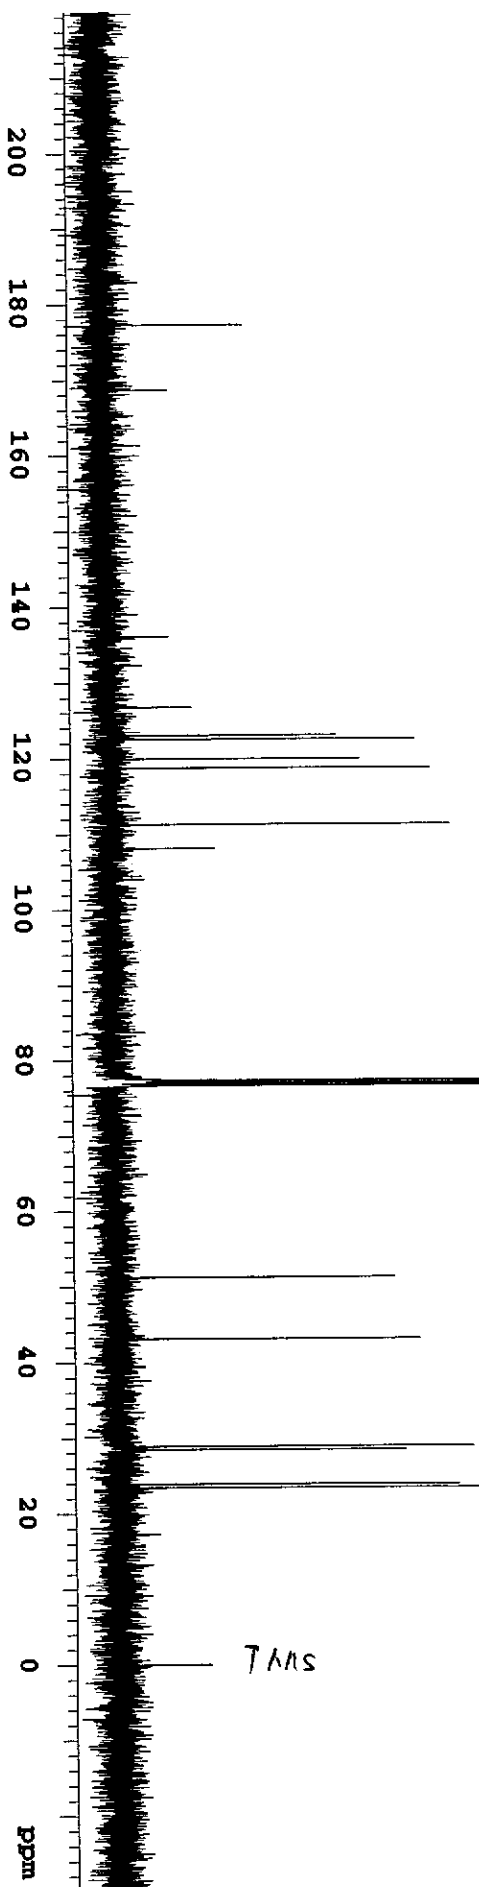

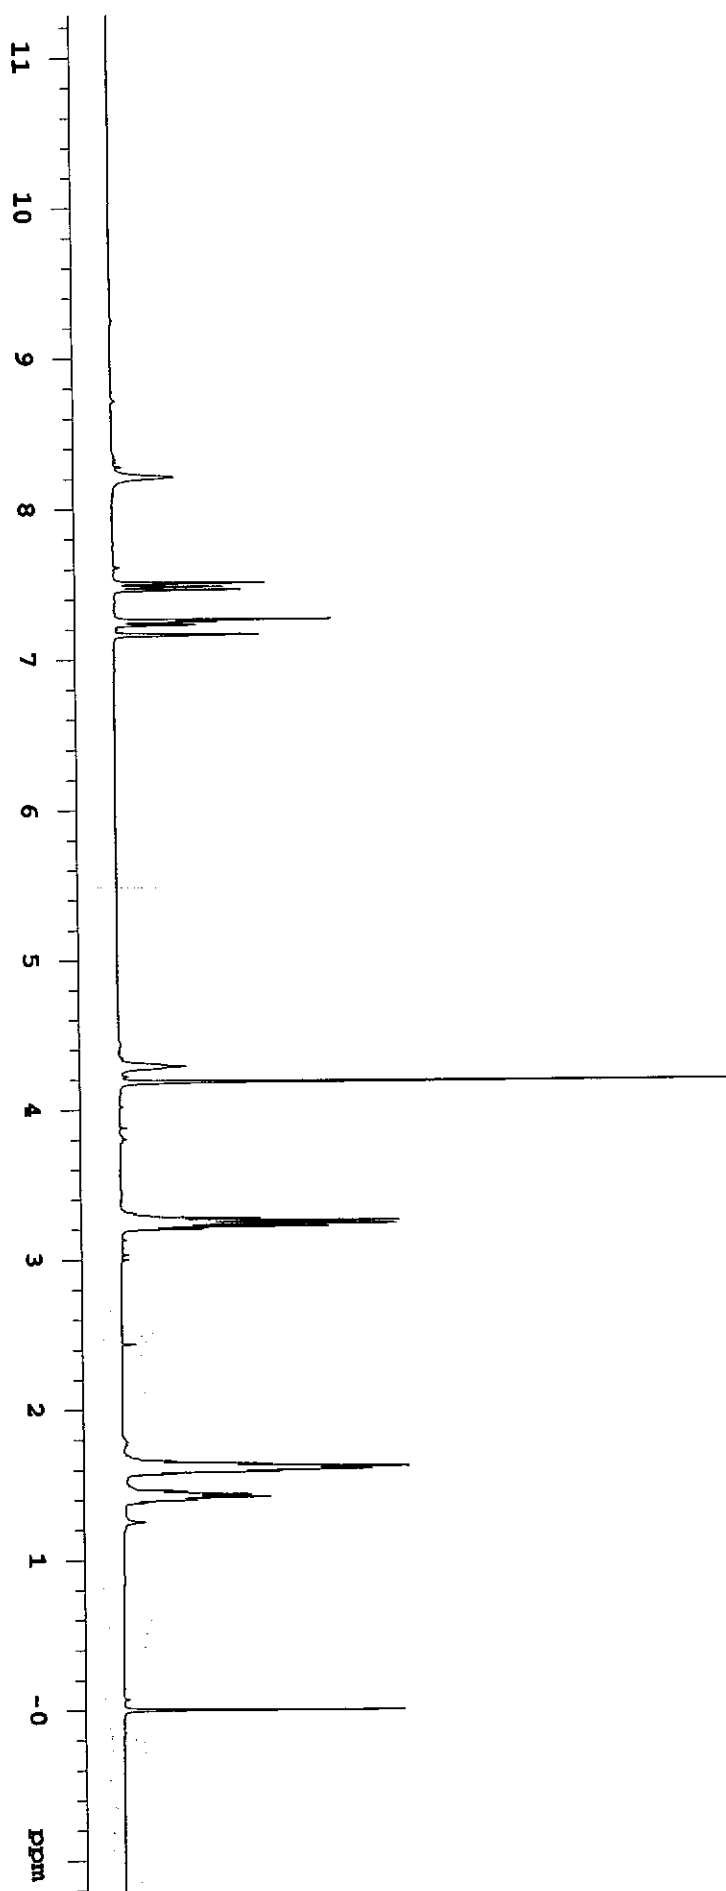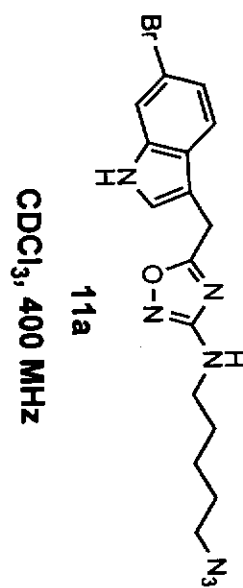

| INDEX | FREQUENCY | PPM     | HEIGHT |
|-------|-----------|---------|--------|
| 1     | 17790.593 | 176.975 | 15.4   |
| 2     | 16950.571 | 168.618 | 14.6   |
| 3     | 13759.860 | 136.878 | 17.8   |
| 4     | 12630.676 | 125.646 | 15.8   |
| 5     | 12430.016 | 123.649 | 54.4   |
| 6     | 12388.816 | 123.240 | 65.7   |
| 7     | 12063.794 | 120.006 | 64.1   |
| 8     | 11668.580 | 116.075 | 20.2   |
| 9     | 11479.365 | 114.193 | 63.6   |
| 10    | 10886.543 | 108.296 | 17.5   |
| 11    | 7772.129  | 77.314  | 198.0  |
| 12    | 7740.084  | 76.996  | 200.0  |
| 13    | 7708.803  | 76.684  | 194.9  |
| 14    | 5148.300  | 51.214  | 51.9   |
| 15    | 4332.693  | 43.100  | 63.7   |
| 16    | 2902.138  | 28.869  | 70.5   |
| 17    | 2860.175  | 28.452  | 60.5   |
| 18    | 2400.871  | 23.883  | 71.2   |
| 19    | 2342.886  | 23.306  | 71.2   |

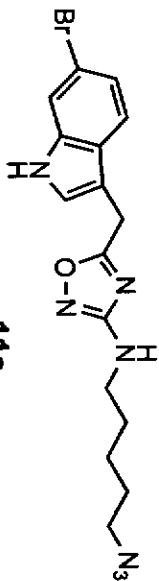

11a

CDCl<sub>3</sub>, 100 MHz

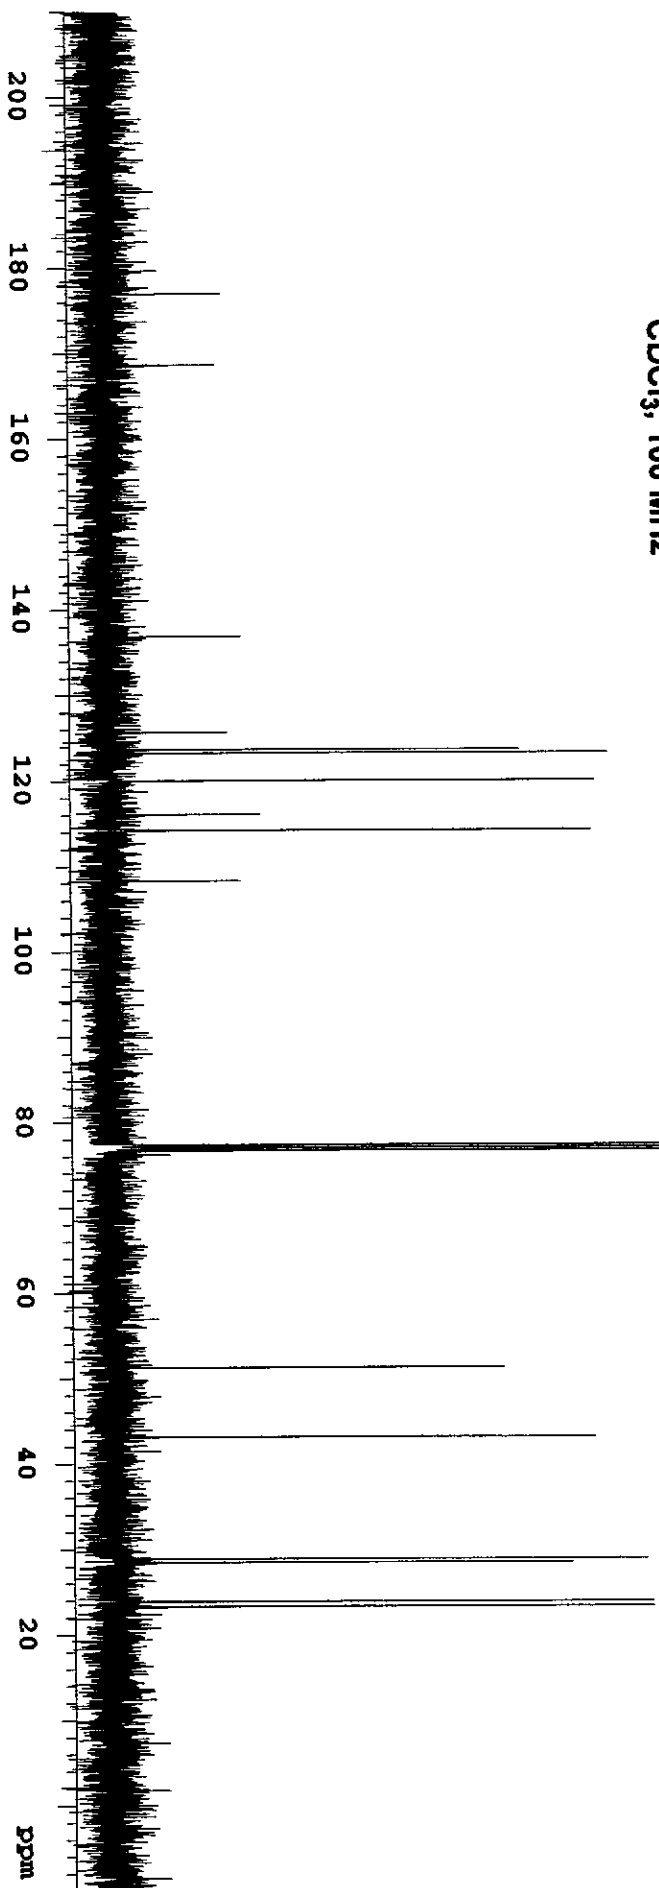

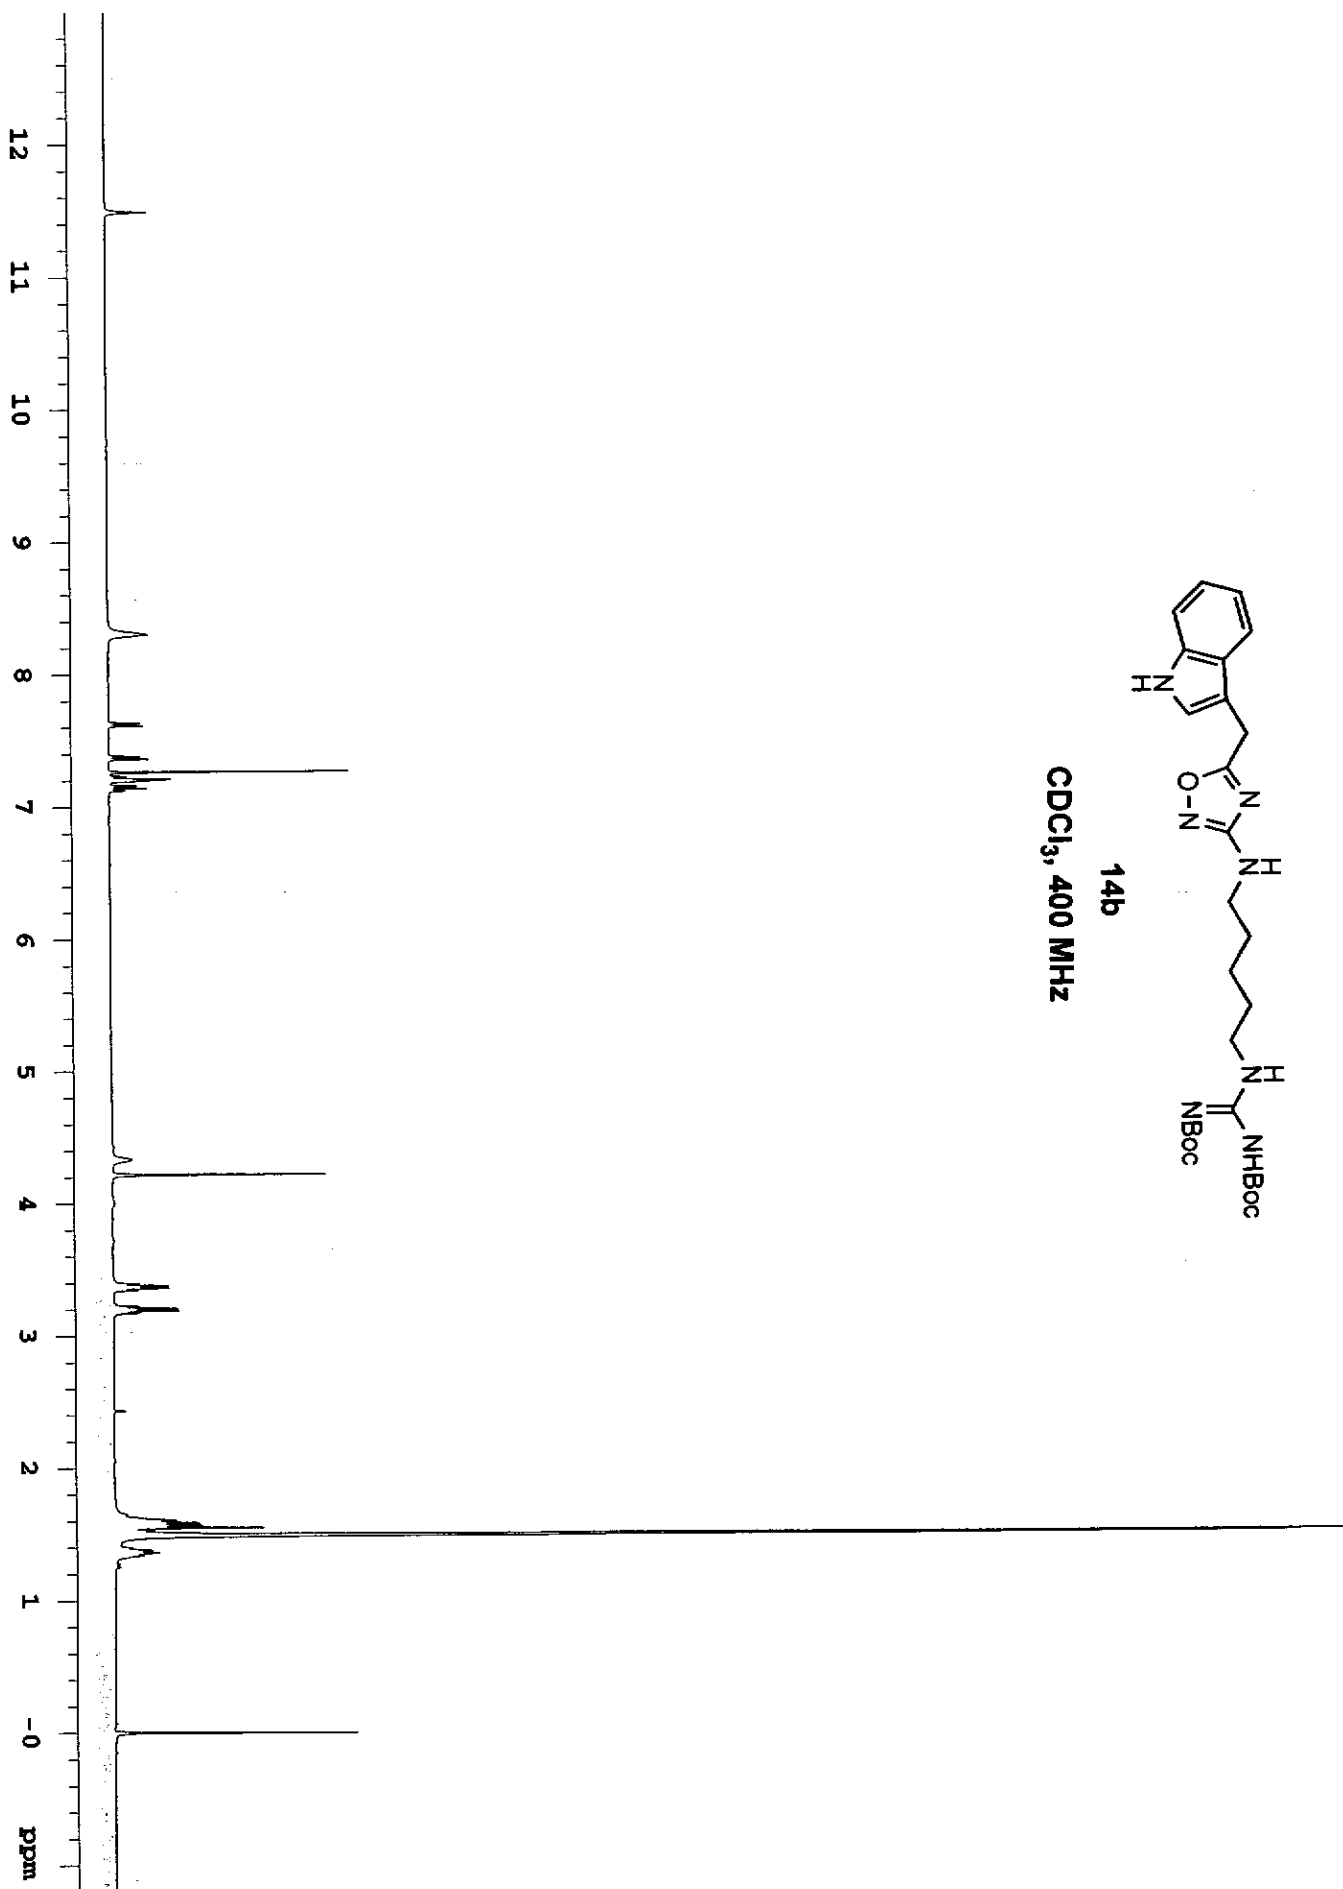

| INDEX | FREQUENCY | PPM     | HEIGHT |
|-------|-----------|---------|--------|
| 1     | 17816.205 | 177.229 | 23.3   |
| 2     | 16959.398 | 168.706 | 17.9   |
| 3     | 16441.346 | 163.553 | 18.4   |
| 4     | 15693.643 | 156.115 | 23.2   |
| 5     | 15409.058 | 153.284 | 17.1   |
| 6     | 13684.762 | 136.131 | 16.7   |
| 7     | 12740.977 | 126.743 | 15.8   |
| 8     | 12368.651 | 123.039 | 42.4   |
| 9     | 12299.222 | 122.348 | 46.1   |
| 10    | 12042.103 | 119.791 | 39.1   |
| 11    | 11927.659 | 118.652 | 47.8   |
| 12    | 11189.874 | 111.313 | 53.1   |
| 13    | 10855.696 | 107.989 | 18.4   |
| 14    | 8353.178  | 83.095  | 33.7   |
| 15    | 7971.697  | 79.300  | 29.5   |
| 16    | 7772.564  | 77.319  | 200.0  |
| 17    | 7740.519  | 77.000  | 199.5  |
| 18    | 7708.475  | 76.681  | 192.8  |
| 19    | 4329.313  | 43.067  | 41.0   |
| 20    | 4090.506  | 40.691  | 42.0   |
| 21    | 2913.254  | 28.980  | 43.9   |
| 22    | 2877.395  | 28.623  | 47.7   |
| 23    | 2840.773  | 28.259  | 136.1  |
| 24    | 2818.647  | 28.039  | 157.4  |
| 25    | 2776.684  | 27.621  | 19.1   |
| 26    | 2411.225  | 23.986  | 49.7   |
| 27    | 2354.002  | 23.417  | 44.5   |

Impurity

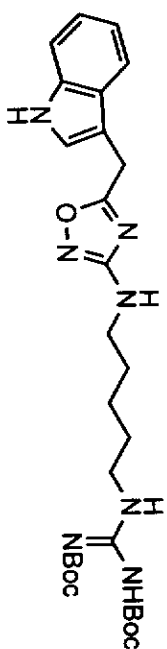

14b

CDCl<sub>3</sub>, 100 MHz

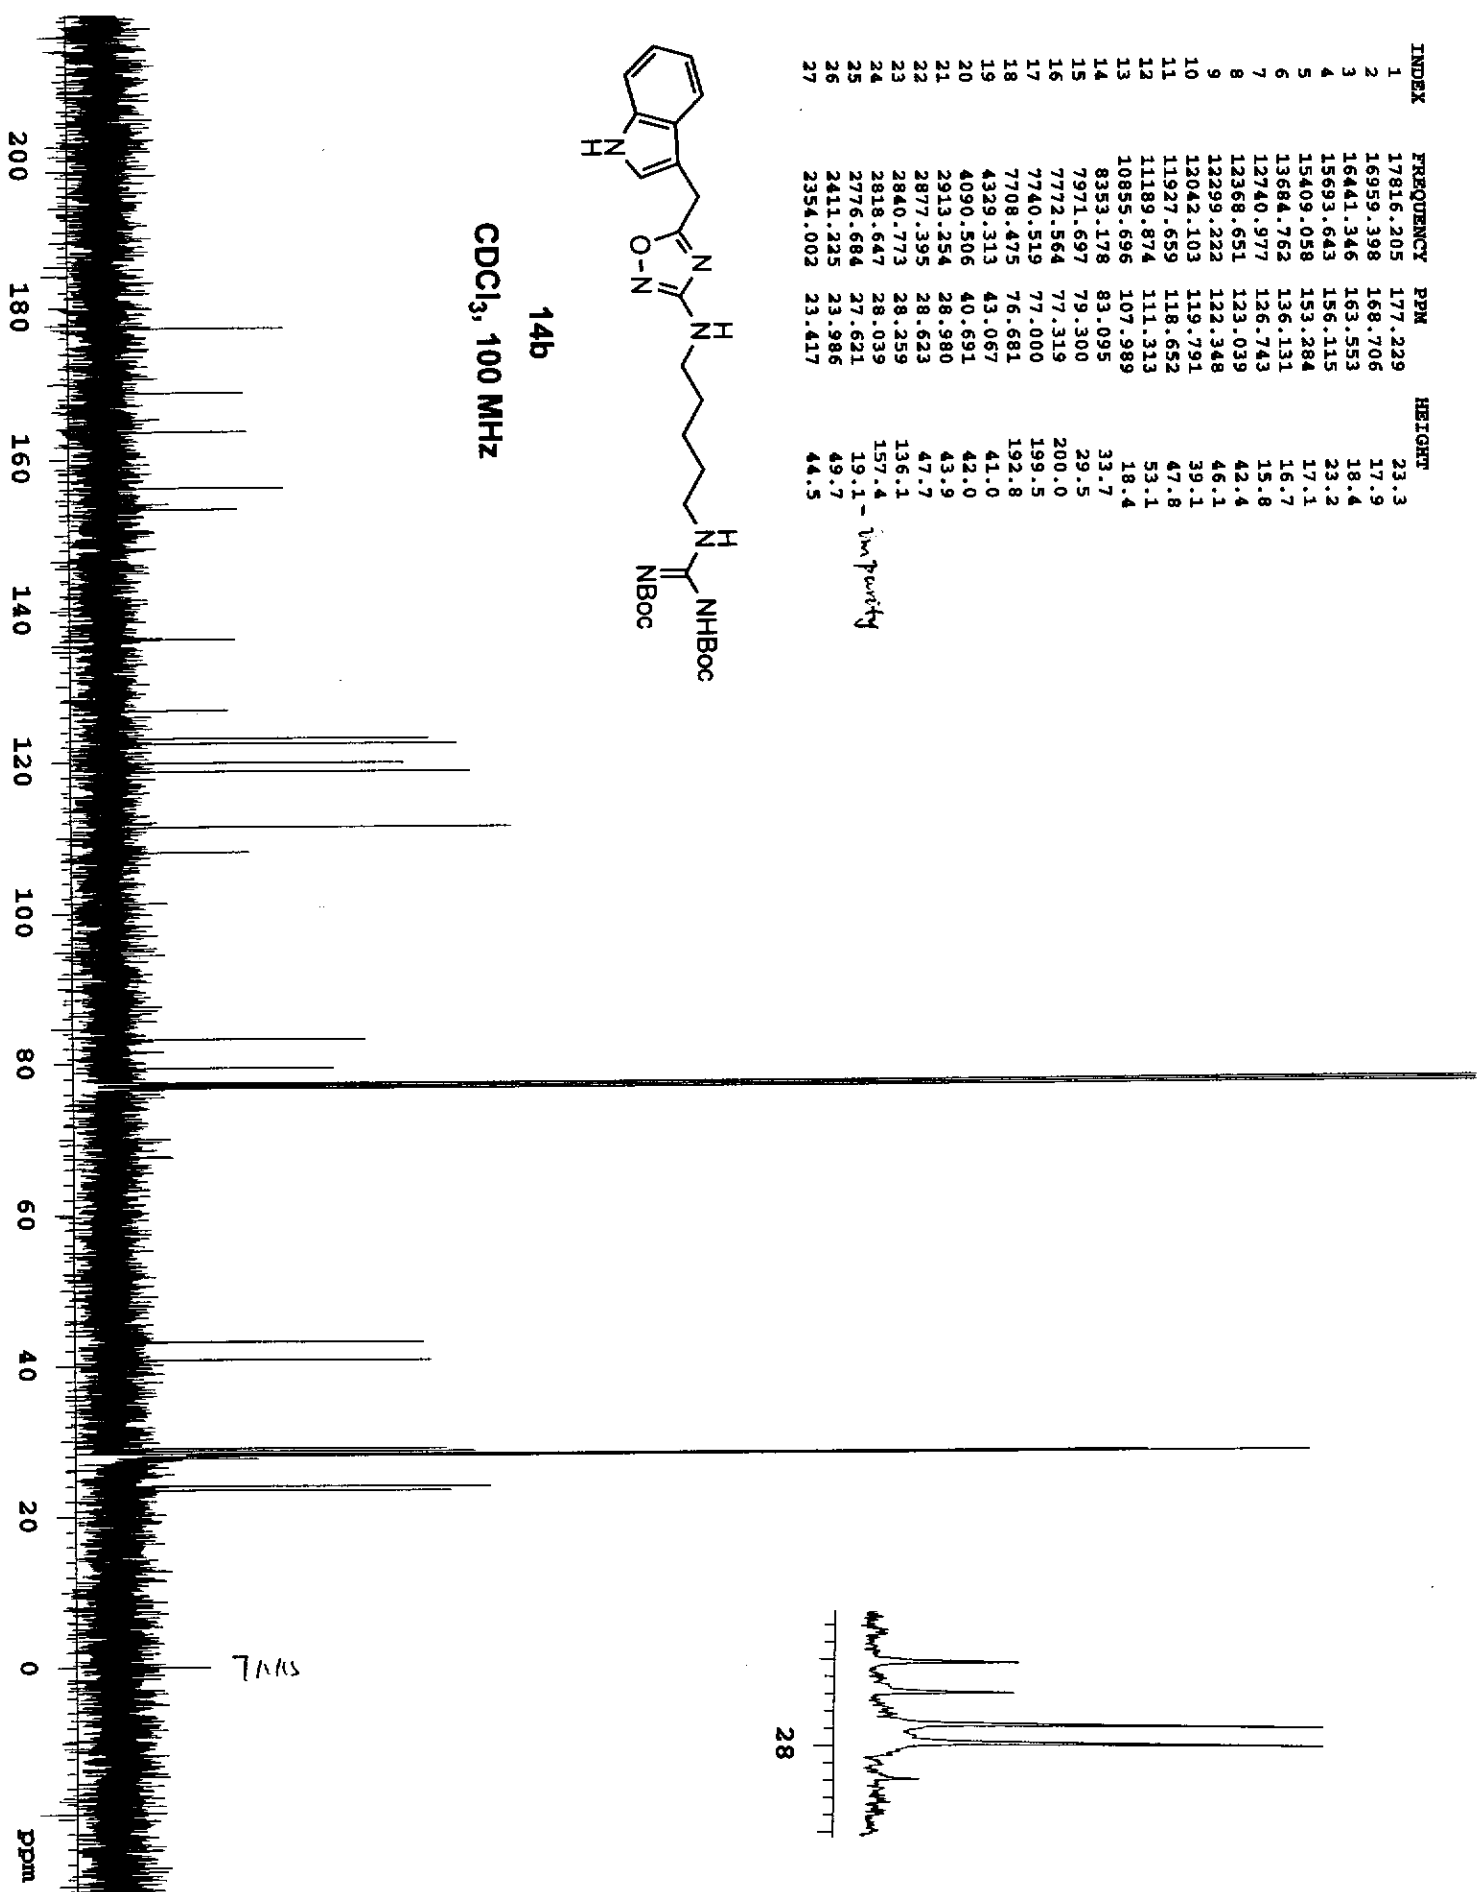



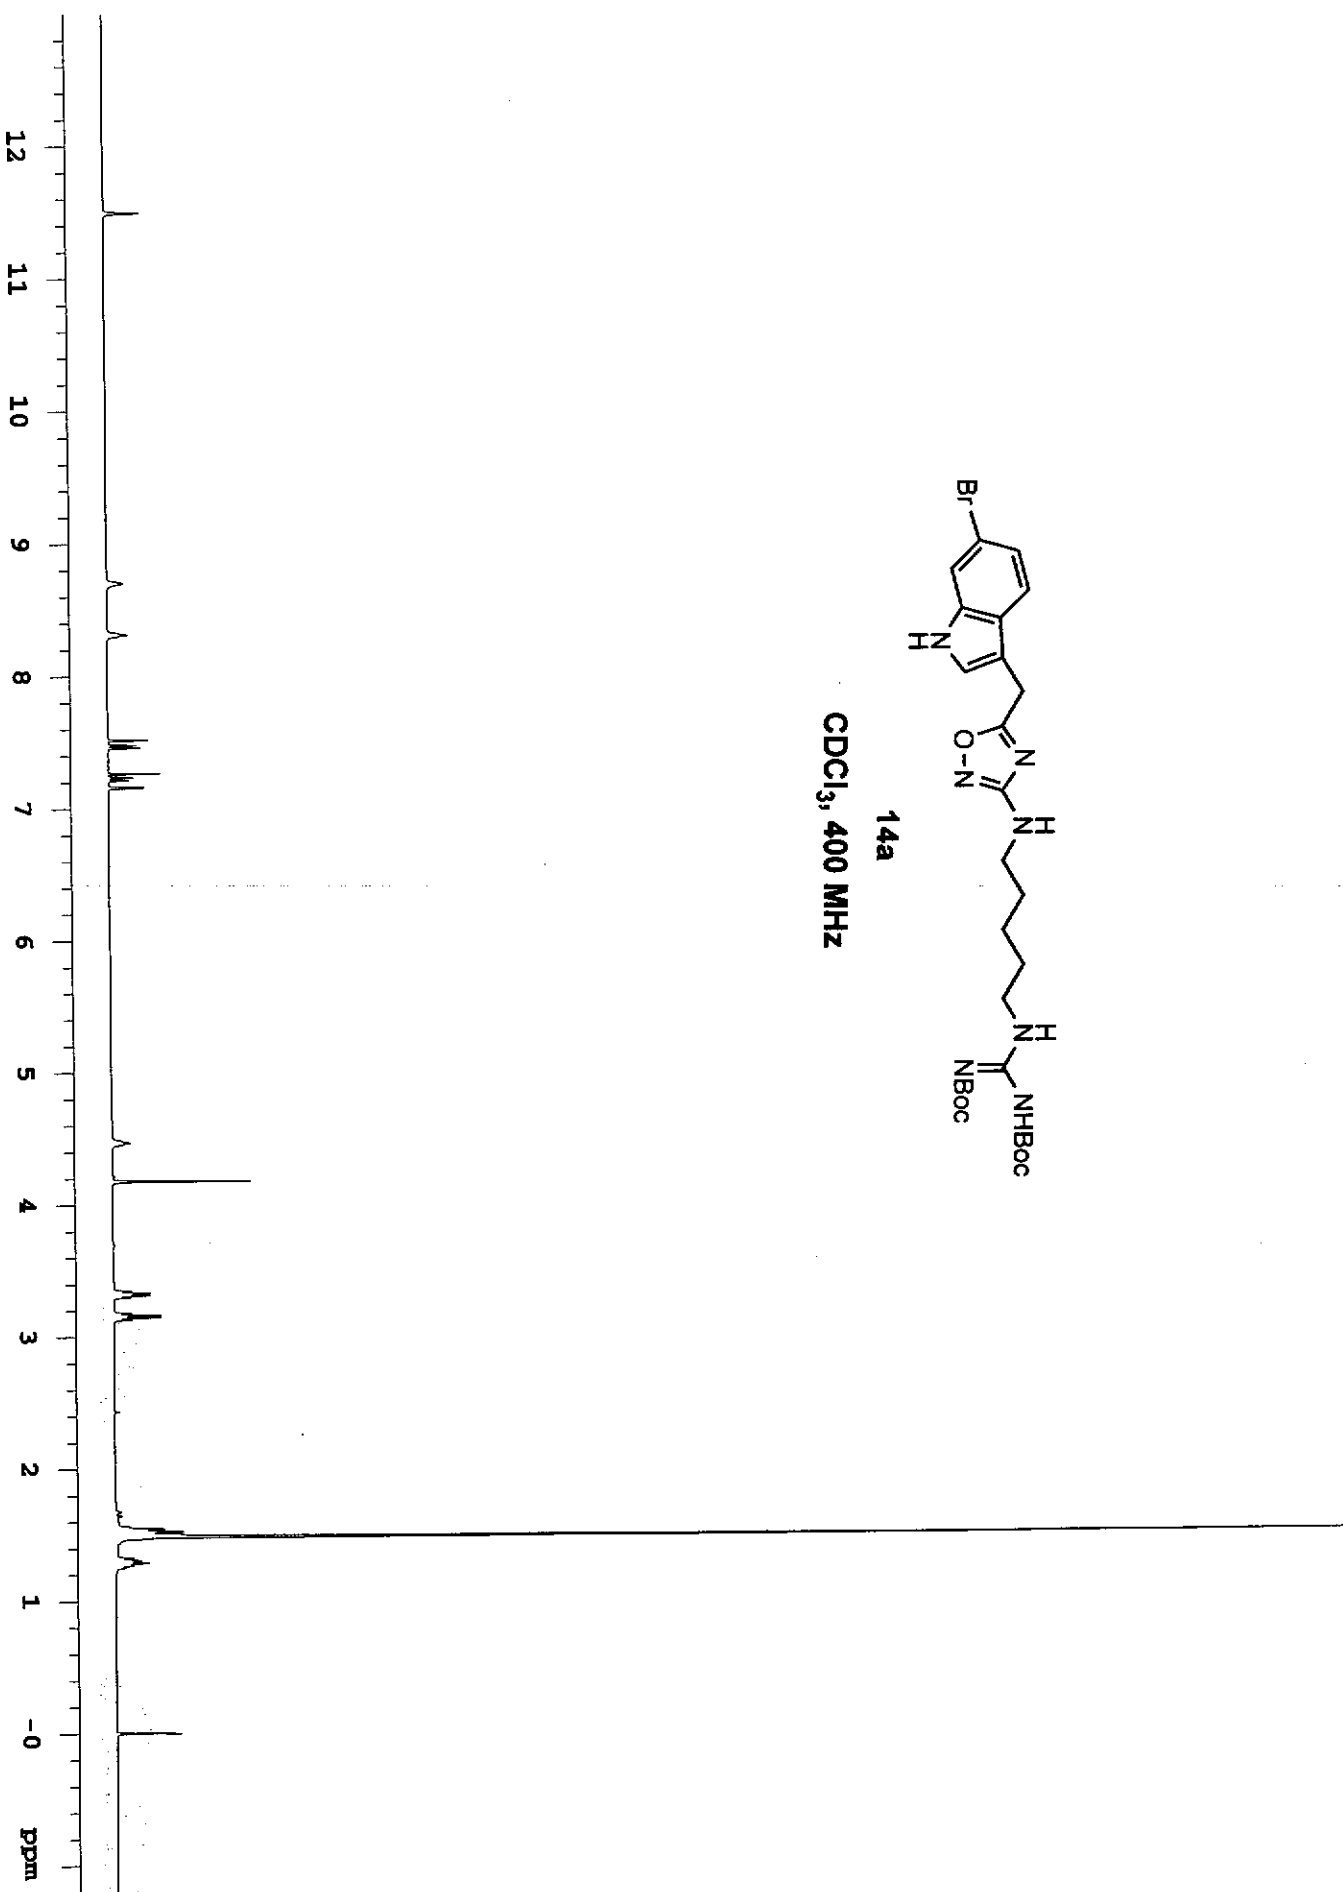

| INDEX | FREQUENCY | PPM     | HEIGHT |
|-------|-----------|---------|--------|
| 1     | 17784.489 | 176.914 | 18.5   |
| 2     | 16959.726 | 168.709 | 17.4   |
| 3     | 16436.334 | 163.503 | 20.4   |
| 4     | 15695.497 | 156.133 | 27.4   |
| 5     | 15407.097 | 153.264 | 18.4   |
| 6     | 13765.964 | 136.939 | 18.6   |
| 7     | 12631.438 | 125.653 | 19.5   |
| 8     | 12434.594 | 123.695 | 30.9   |
| 9     | 12372.031 | 123.073 | 43.5   |
| 10    | 12059.216 | 119.961 | 38.1   |
| 11    | 11651.794 | 115.908 | 17.4   |
| 12    | 11487.757 | 114.276 | 42.7   |
| 13    | 10876.624 | 108.197 | 19.5   |
| 14    | 8358.084  | 83.143  | 28.6   |
| 15    | 7979.655  | 79.379  | 26.0   |
| 16    | 7772.129  | 77.314  | 197.2  |
| 17    | 7740.084  | 76.996  | 197.6  |
| 18    | 7708.040  | 76.677  | 200.0  |
| 19    | 4329.641  | 43.070  | 37.7   |
| 20    | 4093.123  | 40.717  | 36.2   |
| 21    | 2912.056  | 28.968  | 42.8   |
| 22    | 2876.960  | 28.619  | 46.9   |
| 23    | 2840.338  | 28.255  | 128.5  |
| 24    | 2818.975  | 28.042  | 144.2  |
| 25    | 2410.790  | 23.982  | 46.1   |
| 26    | 2343.649  | 23.314  | 40.0   |

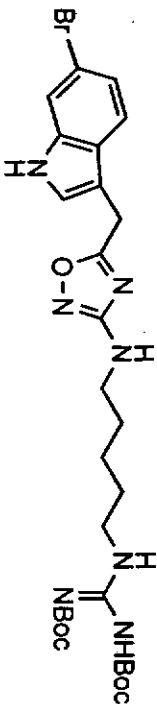

14a

CDCl<sub>3</sub>, 100 MHz

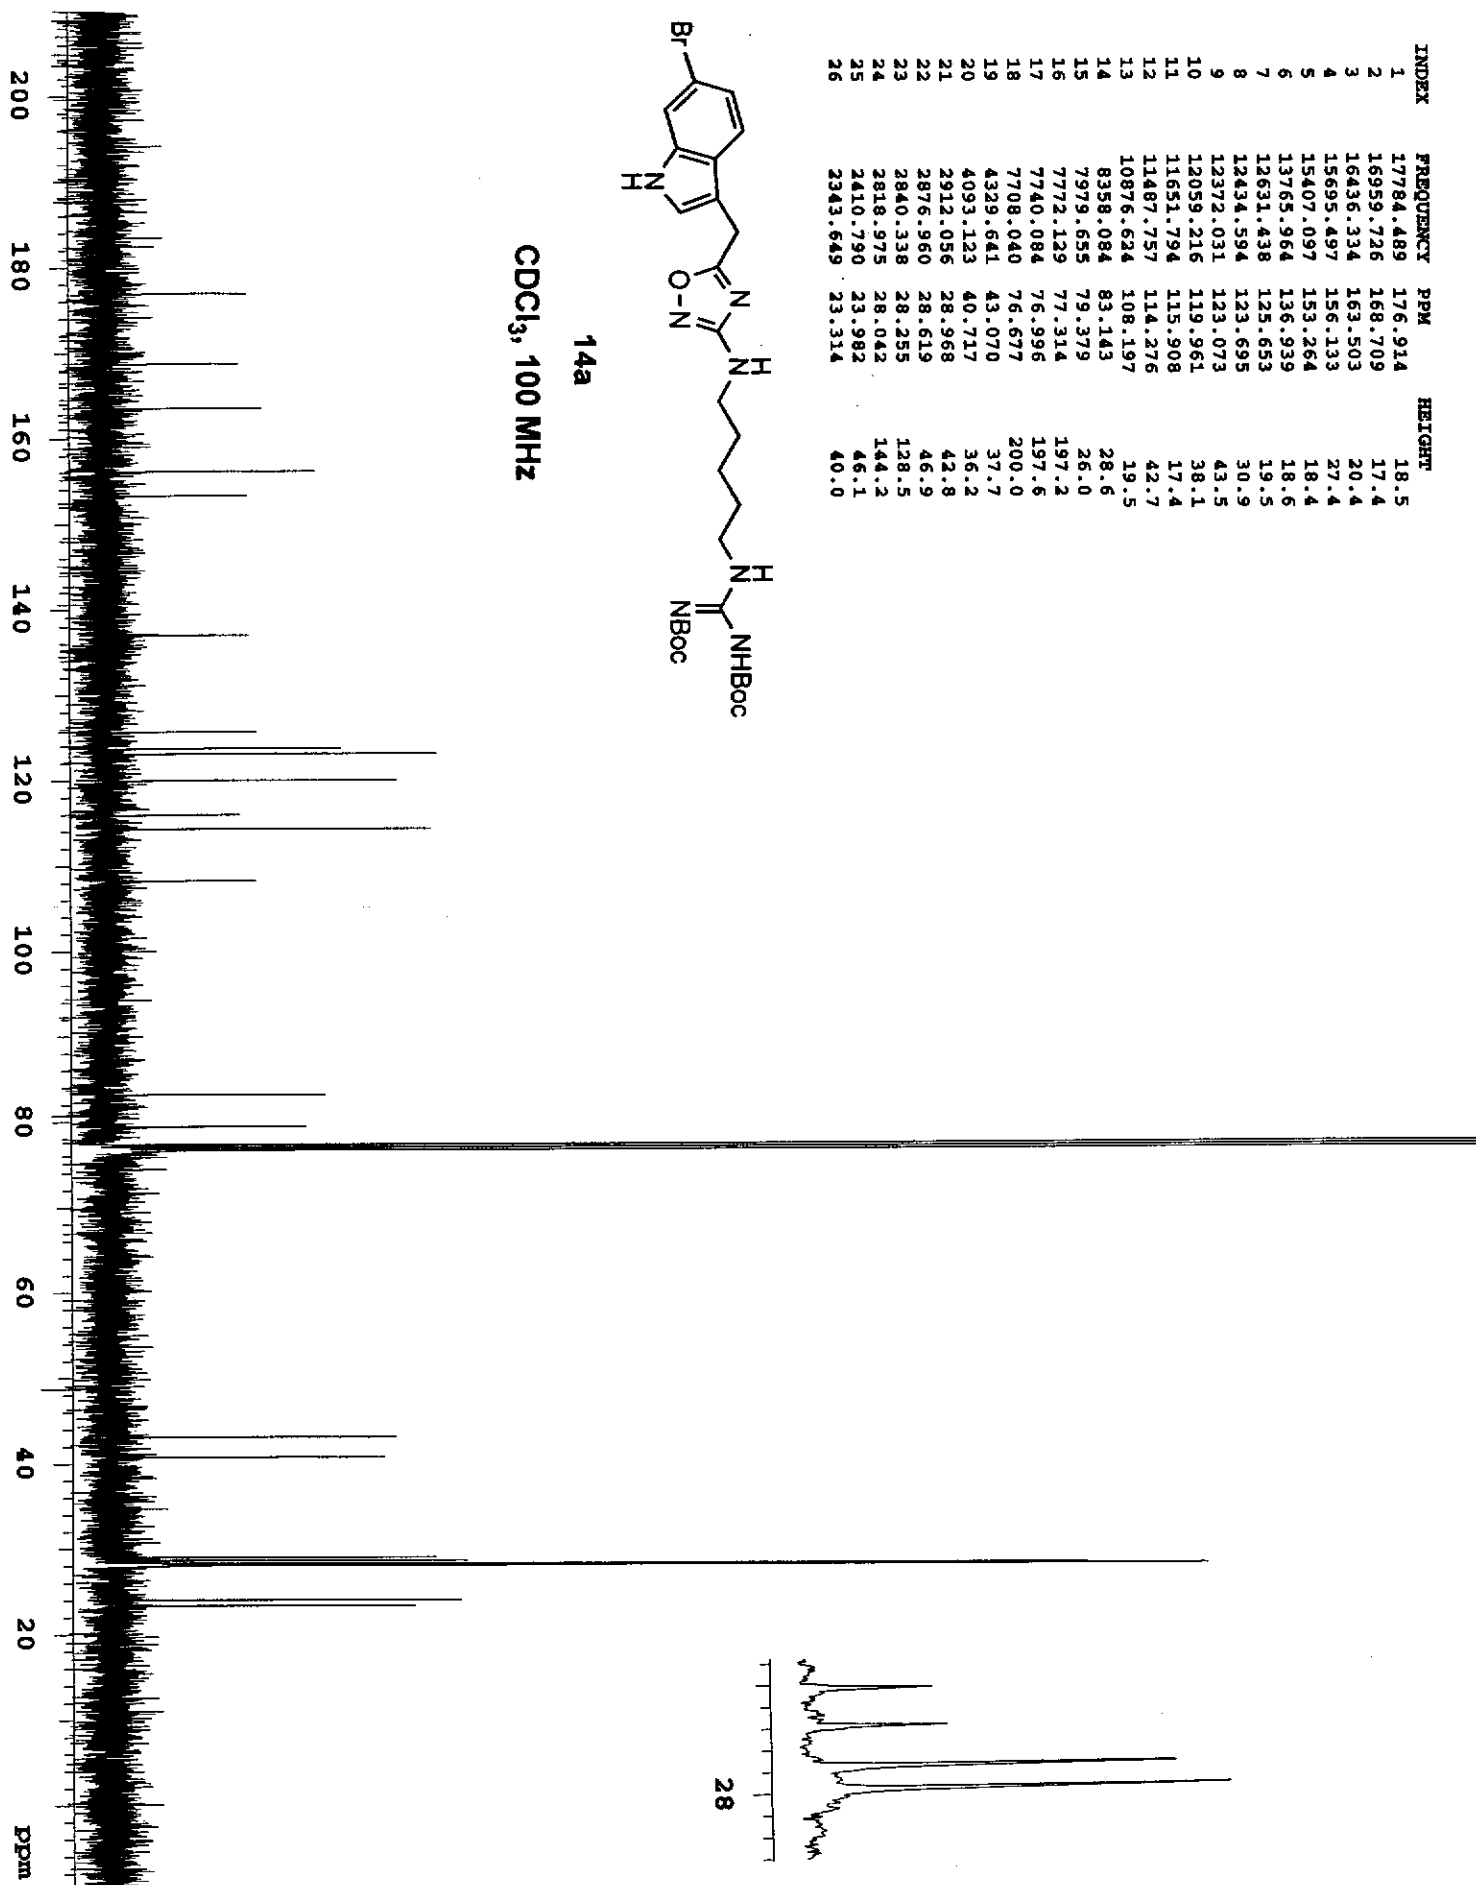

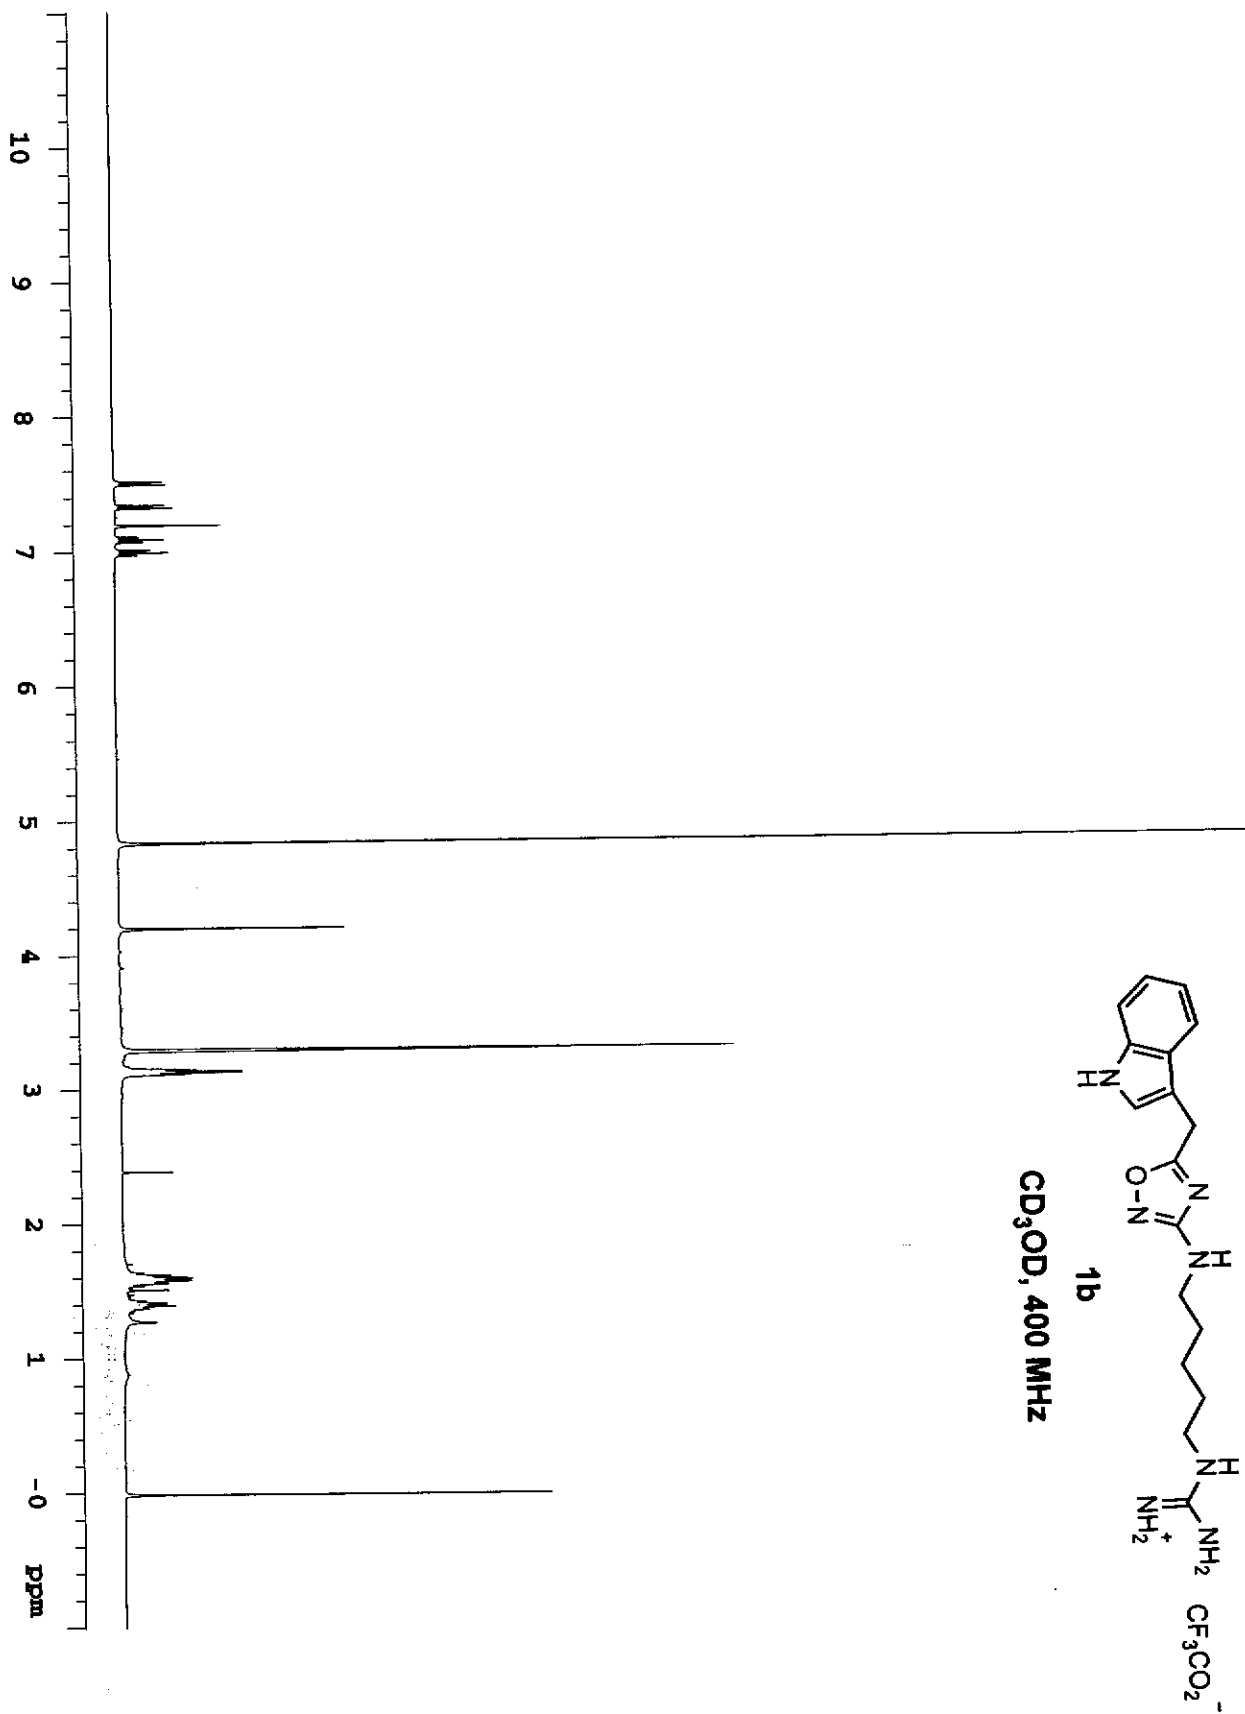

| INDEX | FREQUENCY | PPM     | HEIGHT |
|-------|-----------|---------|--------|
| 1     | 18039.169 | 179.466 | 23.8   |
| 2     | 17109.600 | 170.218 | 16.2   |
| 3     | 15958.927 | 158.771 | 11.7   |
| 4     | 13895.814 | 138.245 | 14.8   |
| 5     | 12897.734 | 128.316 | 17.2   |
| 6     | 12551.287 | 124.869 | 24.9   |
| 7     | 12544.280 | 124.799 | 25.8   |
| 8     | 12349.647 | 122.863 | 48.7   |
| 9     | 12083.388 | 120.214 | 66.6   |
| 10    | 12003.978 | 119.424 | 20.4   |
| 11    | 11994.635 | 119.331 | 19.5   |
| 12    | 11310.304 | 112.523 | 20.0   |
| 13    | 10889.118 | 108.333 | 22.6   |
| 14    | 5004.184  | 49.785  | 527.6  |
| 15    | 4983.163  | 49.576  | 1591.4 |
| 16    | 4961.365  | 49.359  | 3109.6 |
| 17    | 4940.344  | 49.150  | 3600.0 |
| 18    | 4918.545  | 48.933  | 3195.6 |
| 19    | 4897.525  | 48.724  | 1562.7 |
| 20    | 4875.726  | 48.507  | 571.6  |
| 21    | 4413.277  | 43.906  | 44.8   |
| 22    | 4271.584  | 42.497  | 42.5   |
| 23    | 3004.910  | 29.895  | 64.6   |
| 24    | 2980.776  | 29.655  | 73.3   |
| 25    | 2516.770  | 25.039  | 64.9   |
| 26    | 2436.581  | 24.241  | 43.0   |
| 27    | 10.671    | 0.106   | 13.7   |

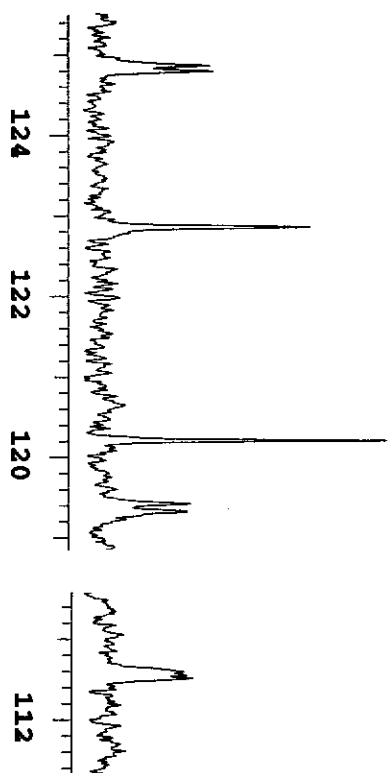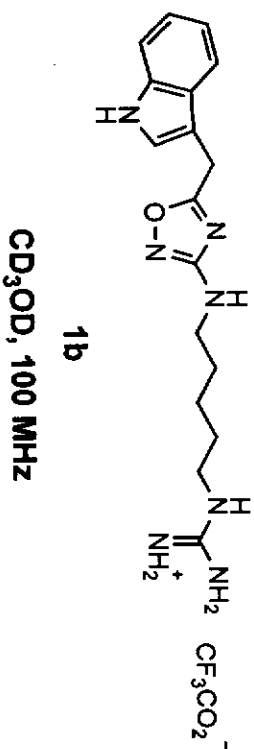

CD<sub>3</sub>OD, 100 MHz

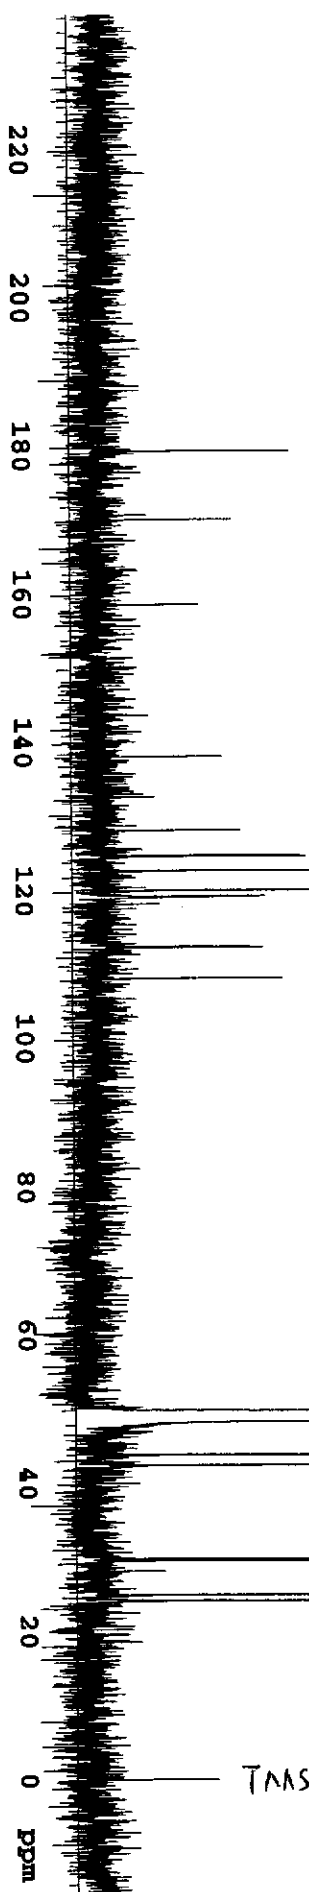

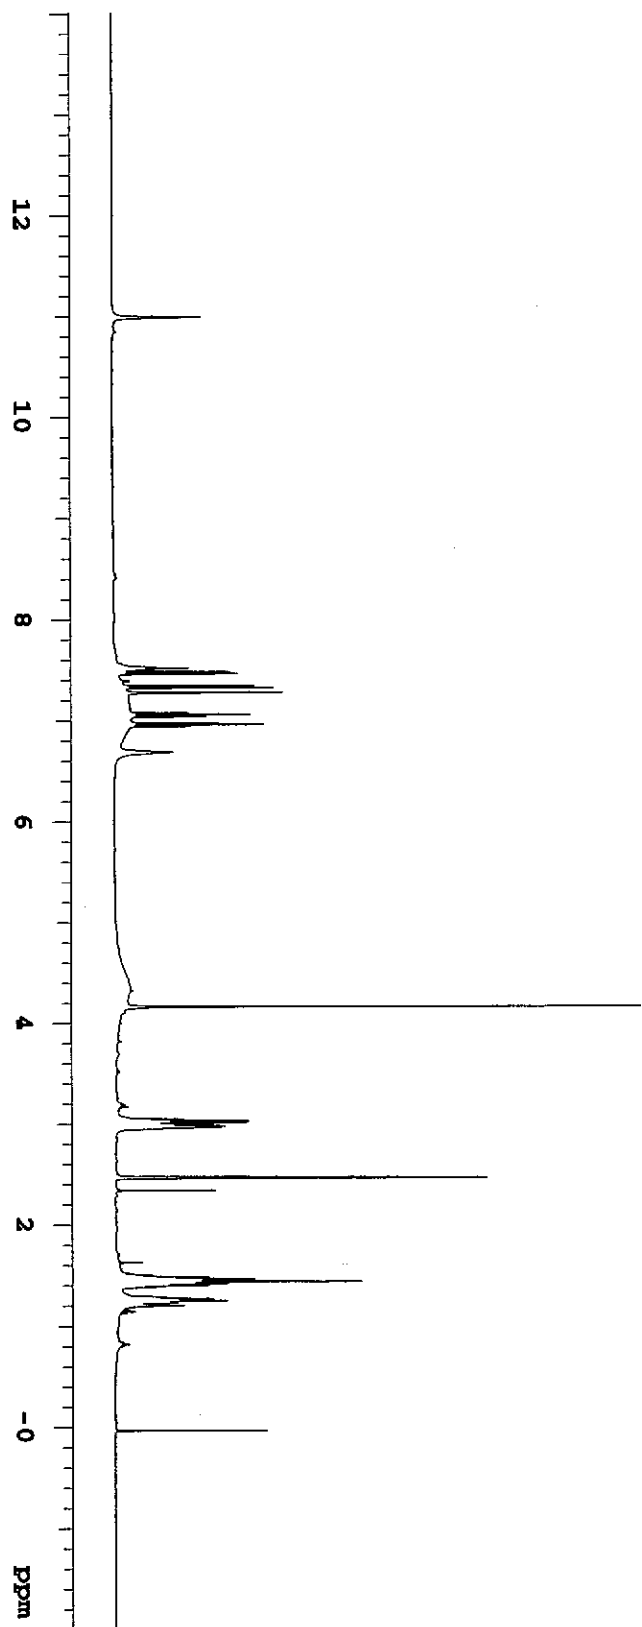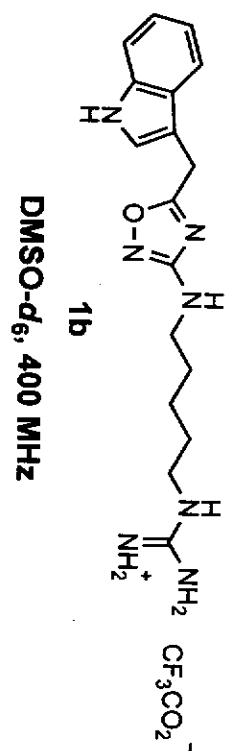

| INDEX | FREQUENCY | PPM     | HEIGHT |
|-------|-----------|---------|--------|
| 1     | 17785.681 | 176.944 | 17.8   |
| 2     | 16940.973 | 168.540 | 17.4   |
| 3     | 15752.931 | 156.721 | 20.8   |
| 4     | 13685.924 | 136.157 | 14.2   |
| 5     | 12734.557 | 126.692 | 13.1   |
| 6     | 12482.312 | 124.182 | 14.5   |
| 7     | 12187.248 | 121.247 | 26.6   |
| 8     | 11926.439 | 118.652 | 27.7   |
| 9     | 11896.076 | 118.350 | 12.1   |
| 10    | 11210.967 | 111.534 | 14.3   |
| 11    | 10747.739 | 106.926 | 16.9   |
| 12    | 4250.878  | 42.291  | 22.9   |
| 13    | 4088.943  | 40.680  | 23.4   |
| 14    | 4034.446  | 40.137  | 71.0   |
| 15    | 4013.425  | 39.928  | 215.5  |
| 16    | 3992.405  | 39.719  | 427.3  |
| 17    | 3971.385  | 39.510  | 500.0  |
| 18    | 3950.364  | 39.301  | 424.5  |
| 19    | 3929.344  | 39.092  | 212.4  |
| 20    | 3908.323  | 38.883  | 68.5   |
| 21    | 2828.498  | 28.140  | 36.3   |
| 22    | 2354.371  | 23.423  | 24.8   |
| 23    | 2285.860  | 22.741  | 16.5   |

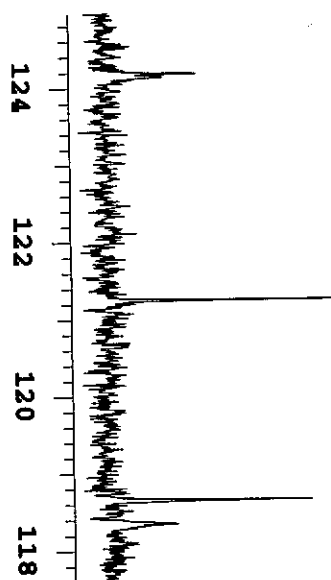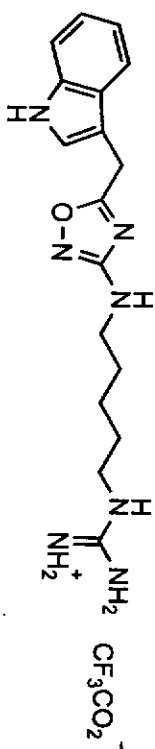

**1b**  
DMSO-*d*<sub>6</sub>, 100 MHz

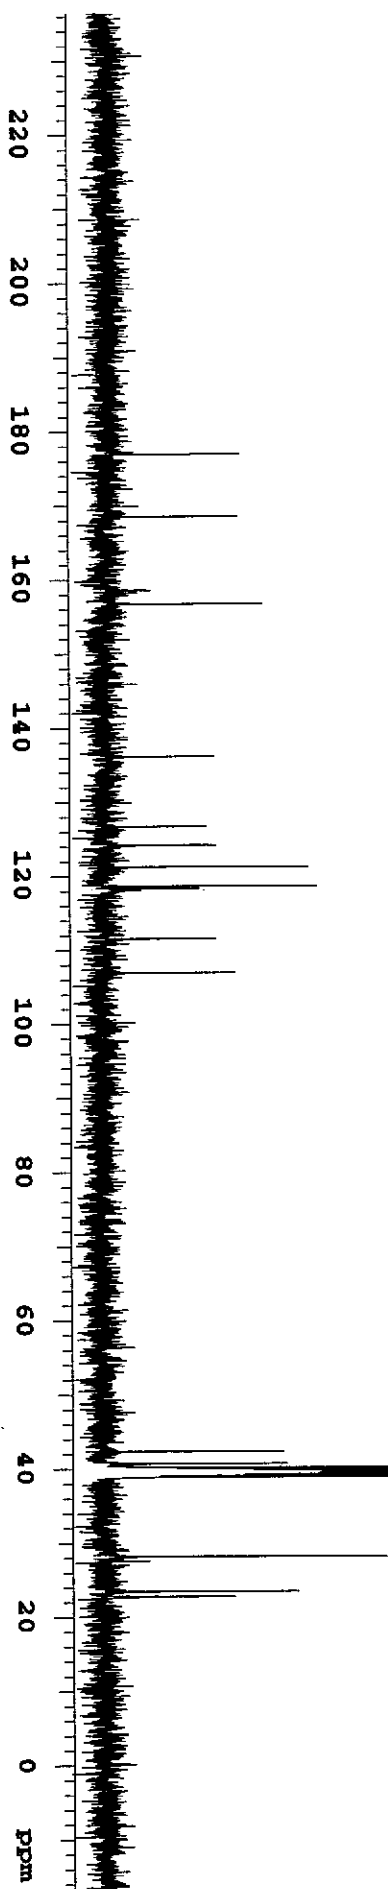

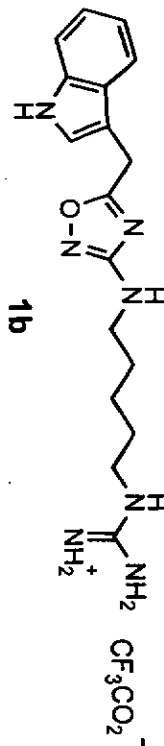

HSQC (CD<sub>3</sub>OD, 400 MHz)

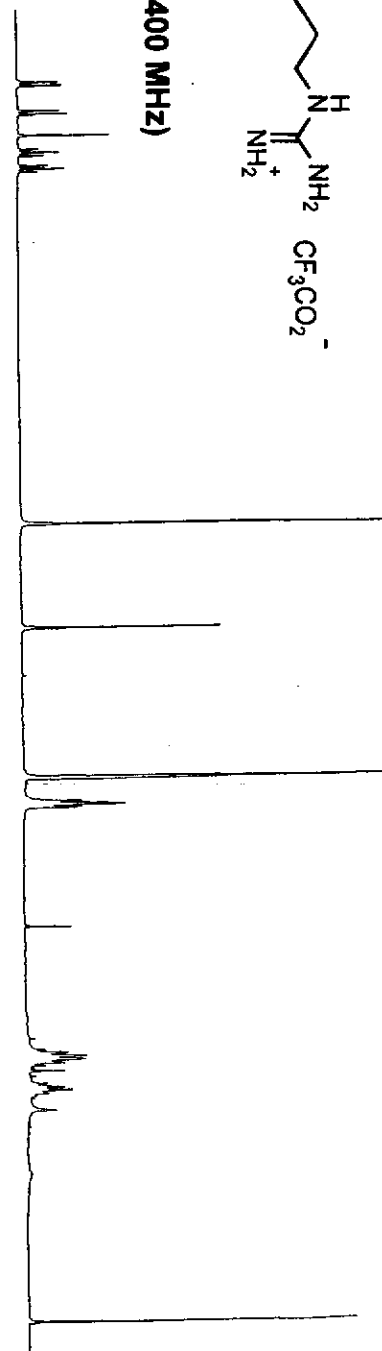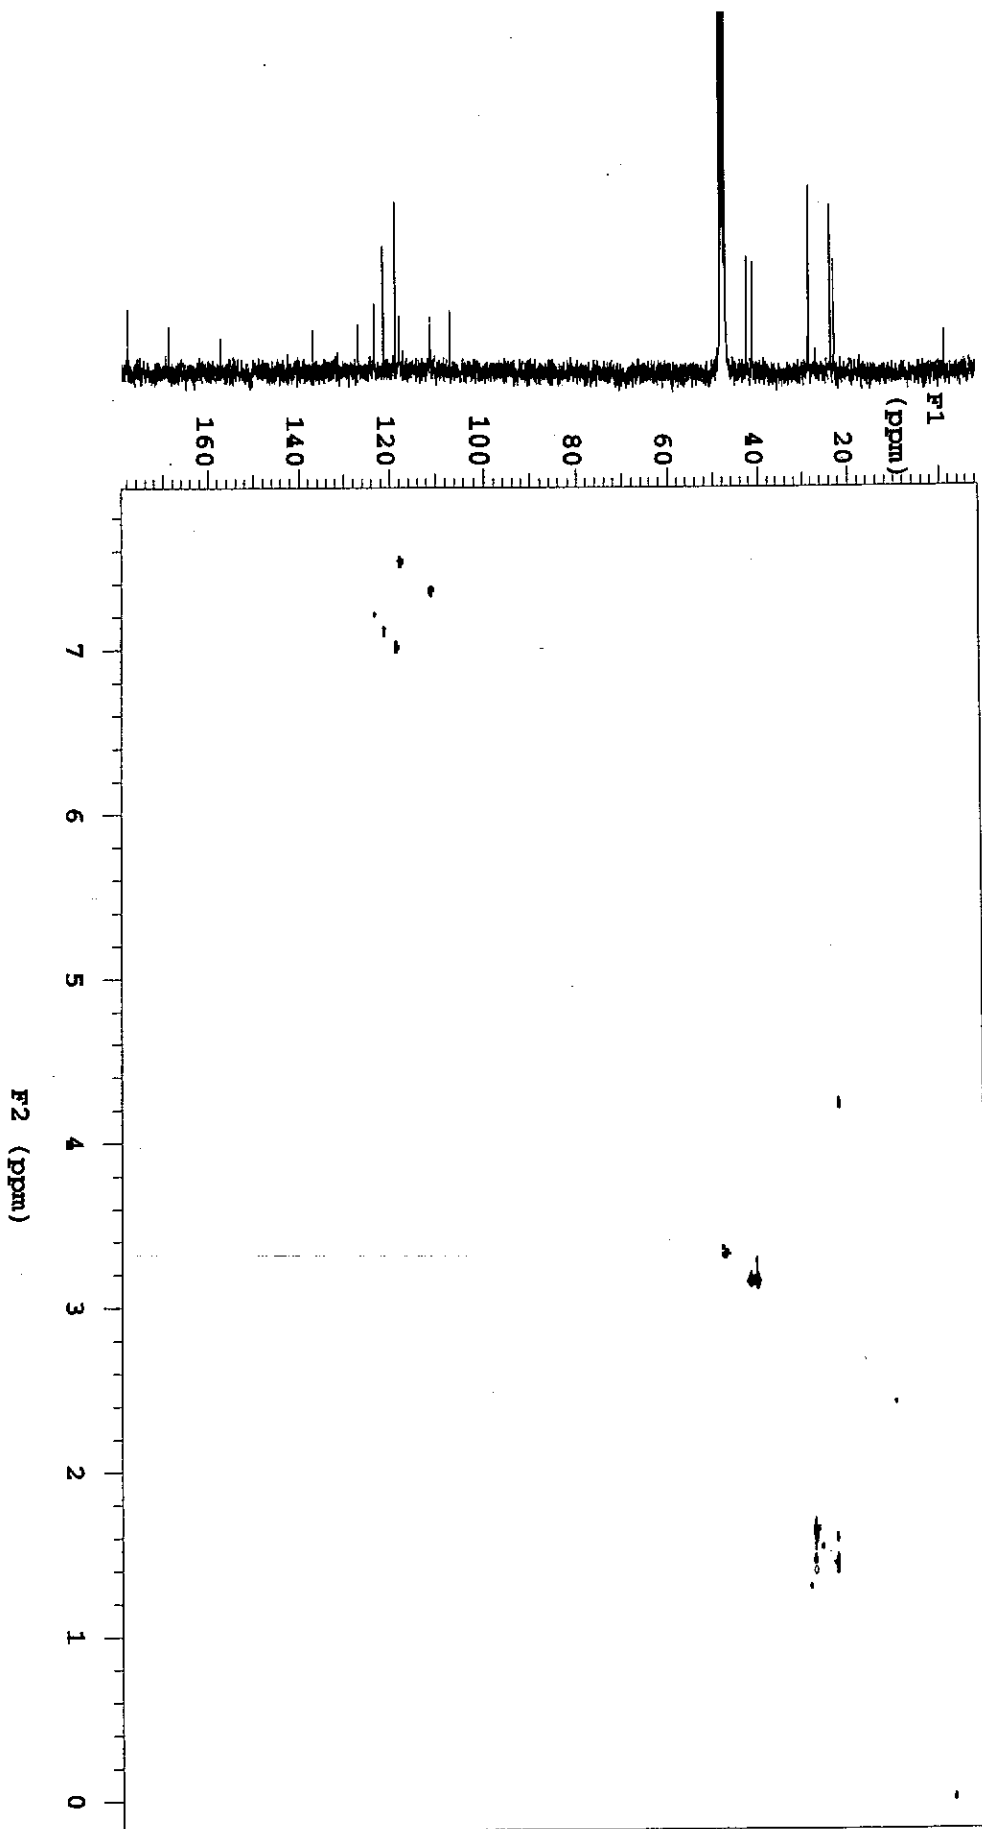

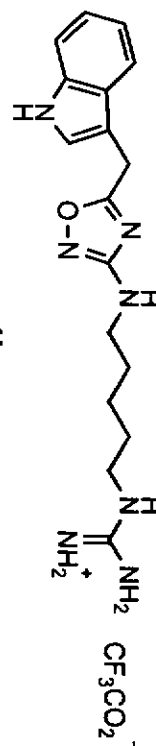

HMBC (CD<sub>3</sub>OD, 400 MHz)

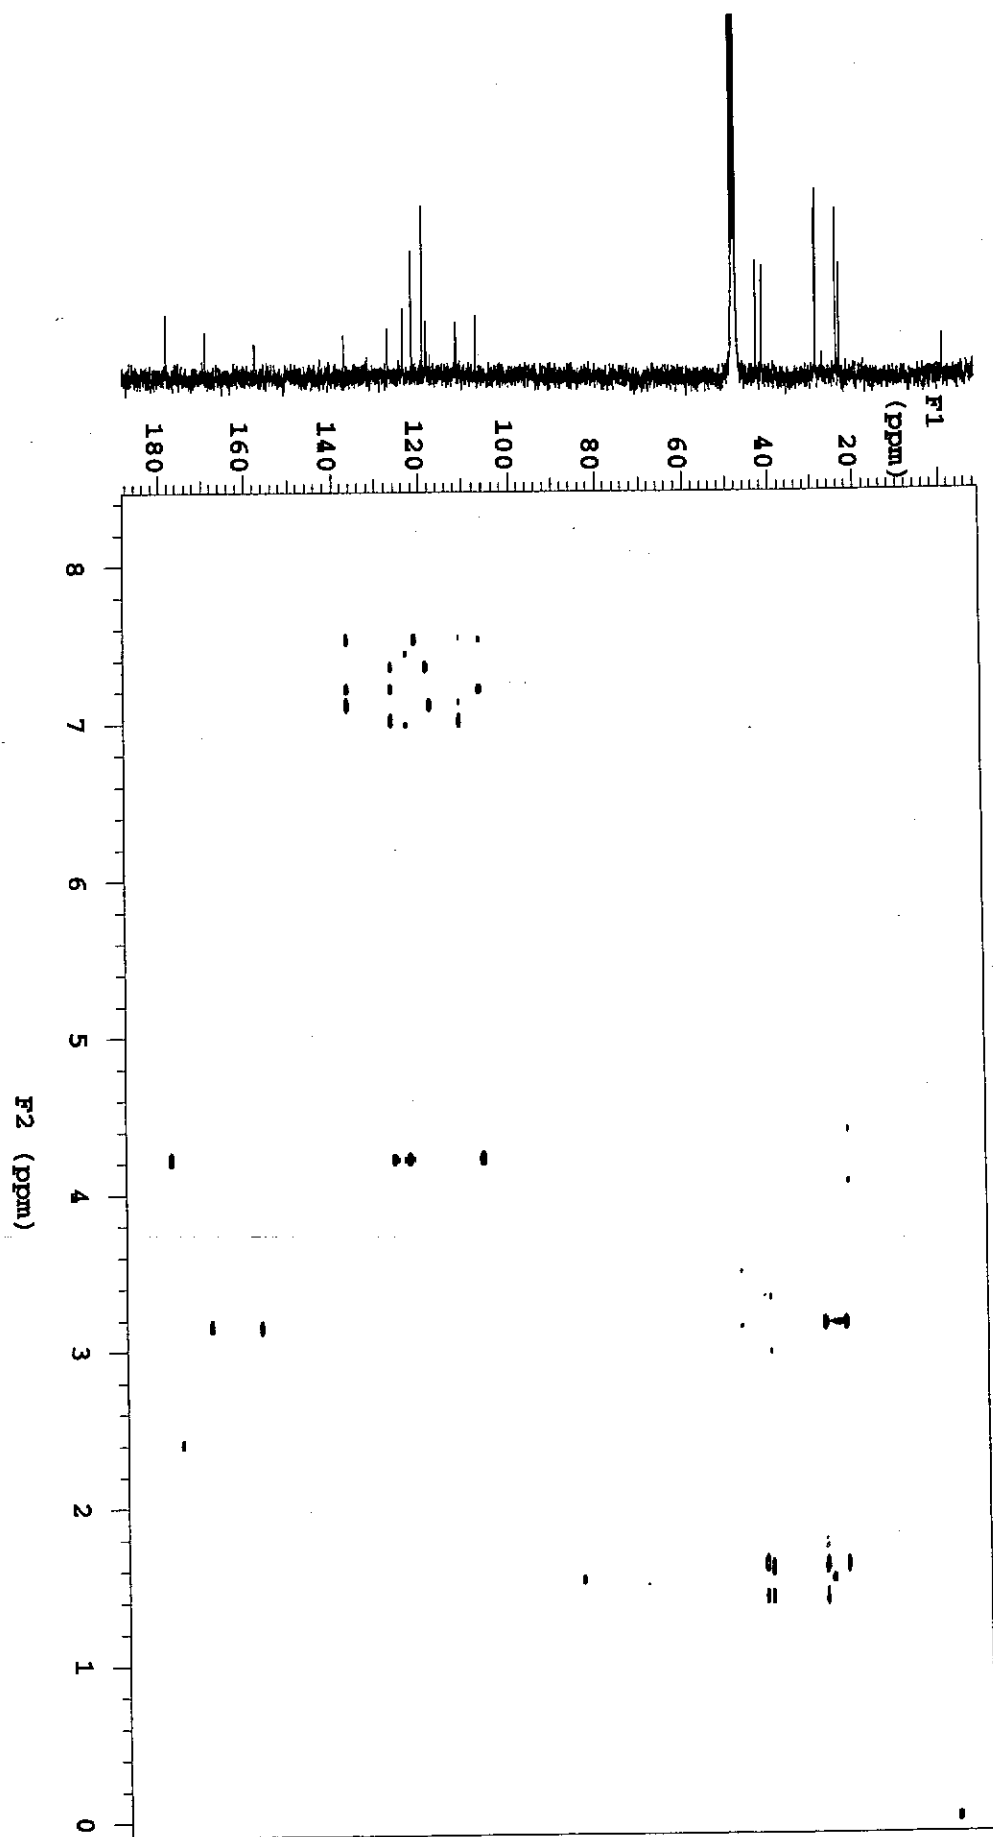



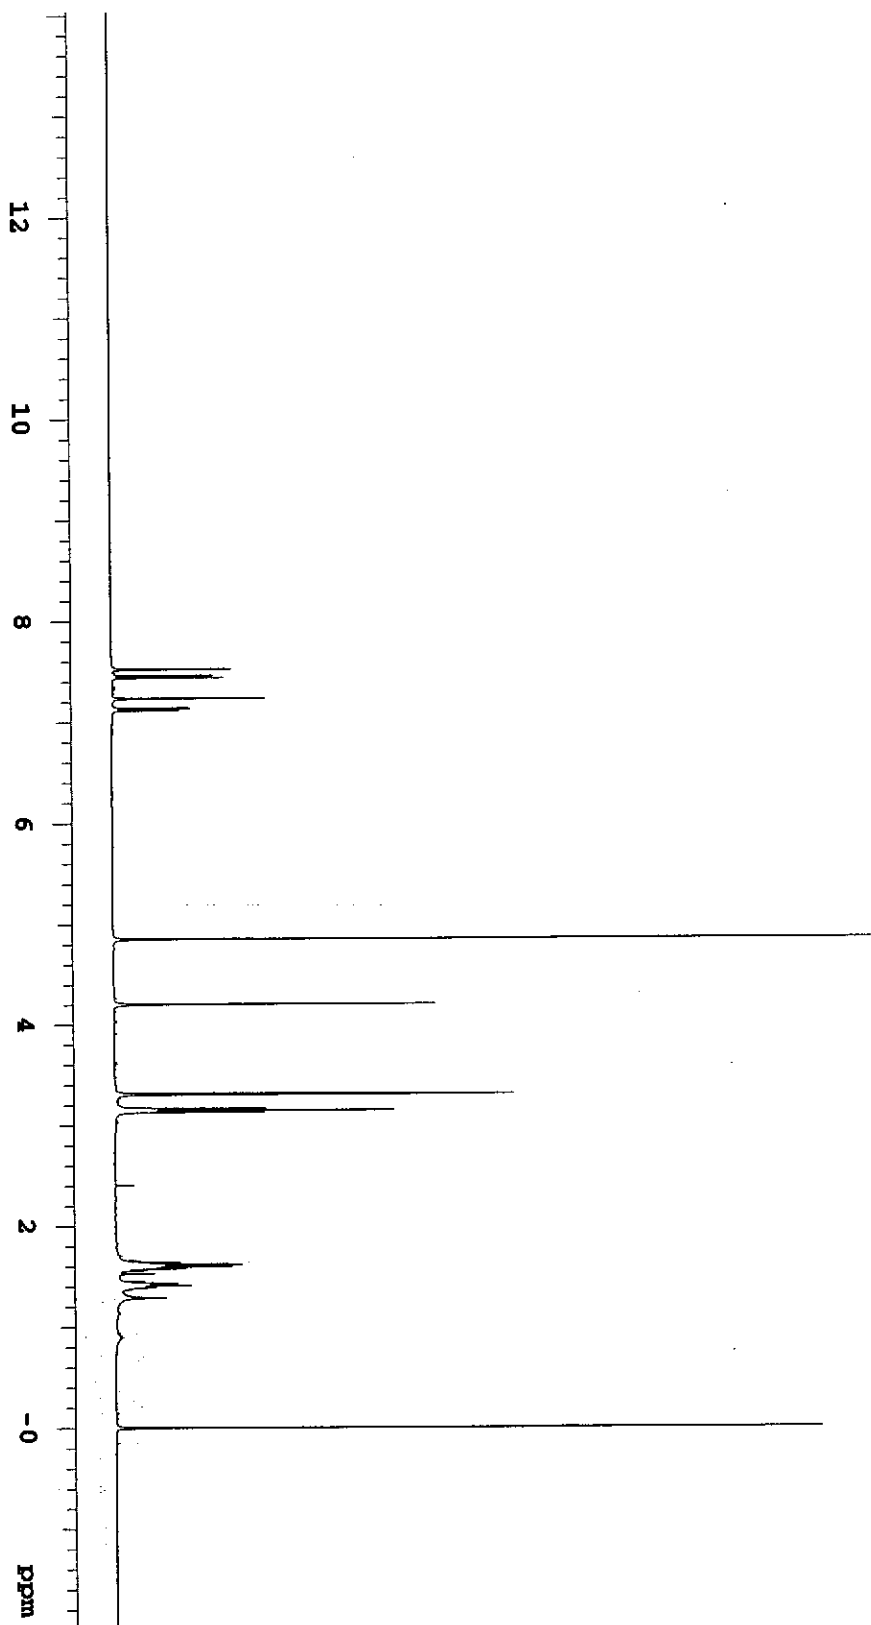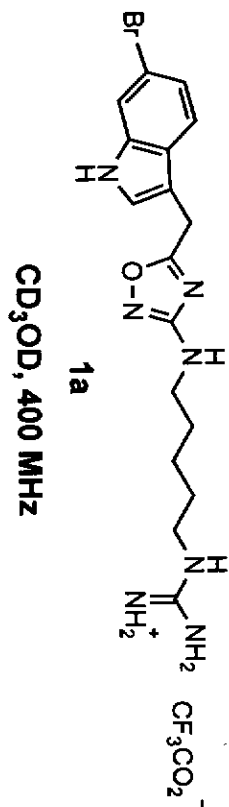

| INDEX | FREQUENCY | PPM     | HEIGHT |
|-------|-----------|---------|--------|
| 1     | 18005.286 | 179.129 | 39.6   |
| 2     | 17112.779 | 170.250 | 29.8   |
| 3     | 15958.798 | 158.769 | 17.2   |
| 4     | 13976.684 | 139.050 | 22.5   |
| 5     | 12797.271 | 127.316 | 22.7   |
| 6     | 12655.010 | 125.901 | 27.3   |
| 7     | 12647.857 | 125.830 | 27.7   |
| 8     | 12402.279 | 123.387 | 48.7   |
| 9     | 12163.853 | 121.015 | 20.0   |
| 10    | 12153.521 | 120.912 | 19.6   |
| 11    | 11692.564 | 116.326 | 33.7   |
| 12    | 11611.500 | 115.519 | 29.2   |
| 13    | 11600.373 | 115.409 | 27.9   |
| 14    | 10939.139 | 108.830 | 34.0   |
| 15    | 5004.719  | 49.790  | 708.0  |
| 16    | 4983.261  | 49.577  | 1987.9 |
| 17    | 4961.802  | 49.363  | 3973.3 |
| 18    | 4940.344  | 49.150  | 4500.0 |
| 19    | 4918.886  | 48.937  | 3476.7 |
| 20    | 4897.427  | 48.723  | 1790.5 |
| 21    | 4876.764  | 48.517  | 559.8  |
| 22    | 4414.218  | 43.916  | 58.7   |
| 23    | 4272.752  | 42.508  | 55.2   |
| 24    | 3005.121  | 29.897  | 92.5   |
| 25    | 2982.073  | 29.668  | 101.2  |
| 26    | 2517.937  | 25.050  | 85.1   |
| 27    | 2417.799  | 24.054  | 57.2   |

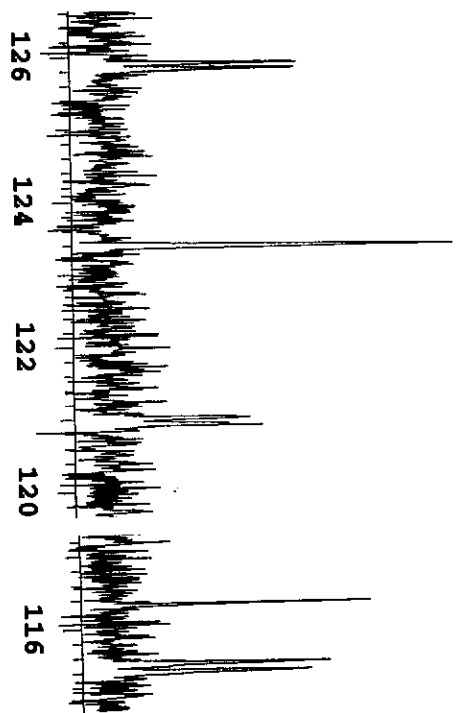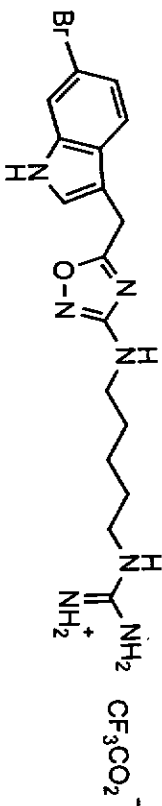

1a

CD<sub>3</sub>OD, 100 MHz

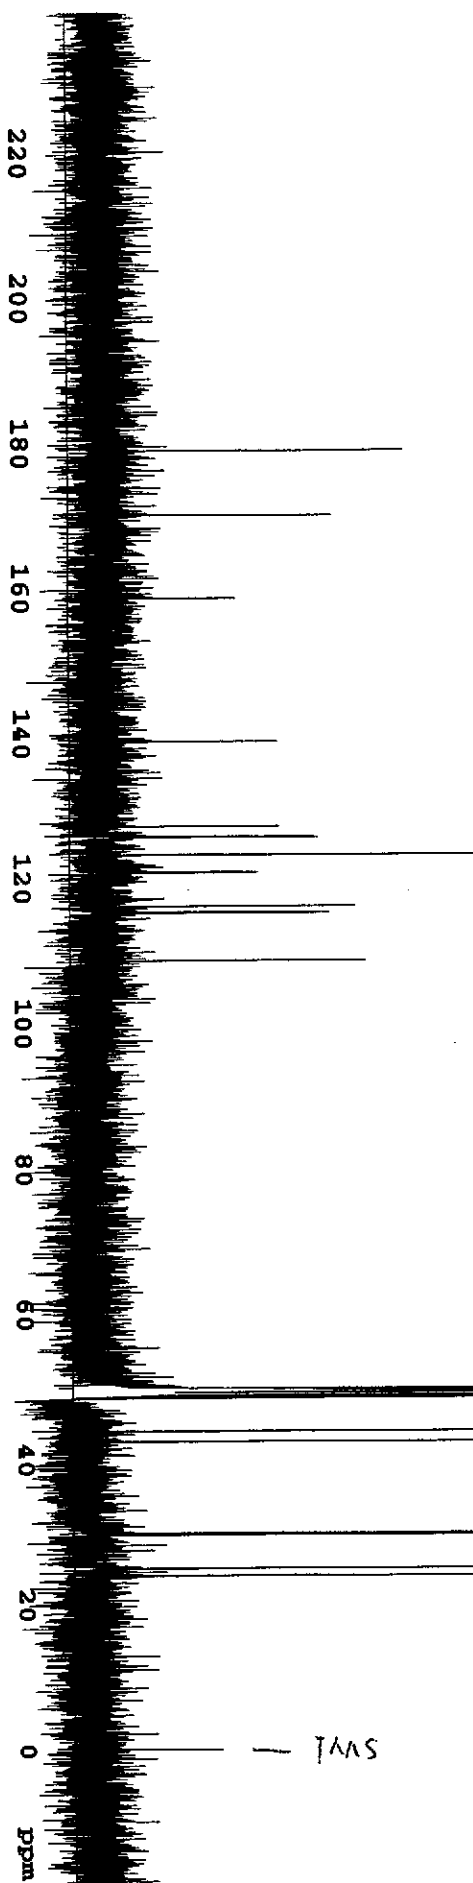

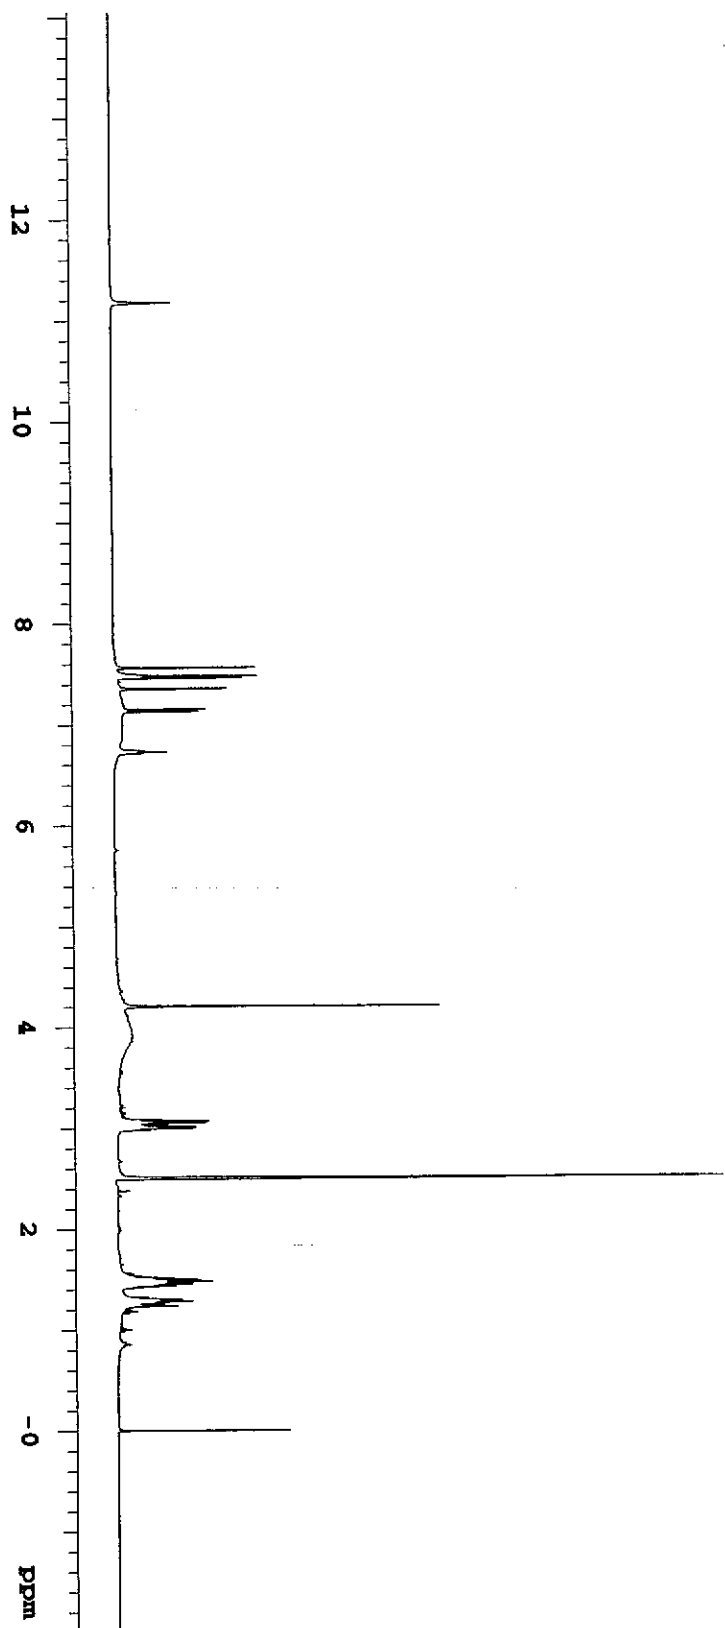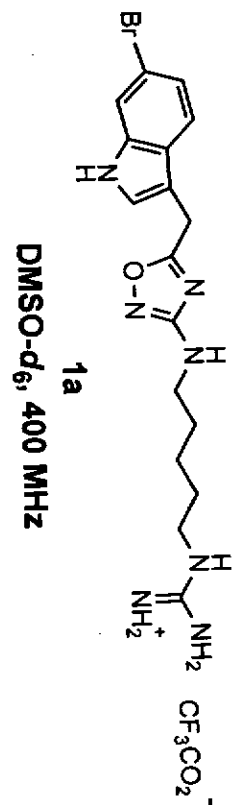

| INDEX | FREQUENCY | PPM     | HEIGHT |
|-------|-----------|---------|--------|
| 1     | 17763.104 | 176.719 | 25.6   |
| 2     | 16938.637 | 168.517 | 22.7   |
| 3     | 15745.924 | 156.651 | 29.5   |
| 4     | 13771.563 | 137.009 | 21.1   |
| 5     | 12642.690 | 125.778 | 17.3   |
| 6     | 12591.306 | 125.267 | 14.5   |
| 7     | 12218.389 | 121.557 | 21.3   |
| 8     | 12079.031 | 120.170 | 13.5   |
| 9     | 11474.111 | 114.152 | 16.0   |
| 10    | 11463.212 | 114.044 | 30.2   |
| 11    | 10793.673 | 107.383 | 17.0   |
| 12    | 4249.321  | 42.275  | 27.4   |
| 13    | 4088.165  | 40.672  | 30.3   |
| 14    | 4034.446  | 40.137  | 207.7  |
| 15    | 4013.425  | 39.928  | 633.5  |
| 16    | 3992.405  | 39.719  | 1275.2 |
| 17    | 3971.385  | 39.510  | 1500.0 |
| 18    | 3950.364  | 39.301  | 1280.0 |
| 19    | 3929.344  | 39.092  | 644.9  |
| 20    | 3908.323  | 38.883  | 214.7  |
| 21    | 2826.941  | 28.124  | 59.9   |
| 22    | 2352.814  | 23.407  | 25.8   |
| 23    | 2264.061  | 22.524  | 21.7   |

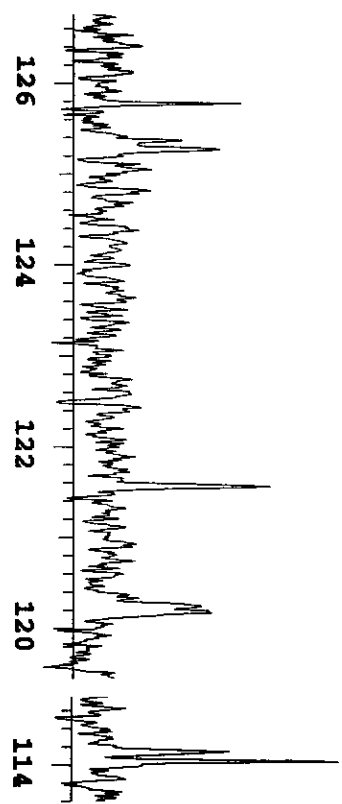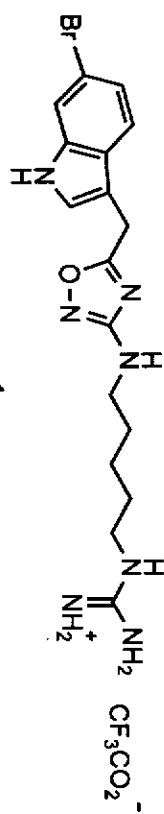

DMSO-d<sub>6</sub>, 100 MHz

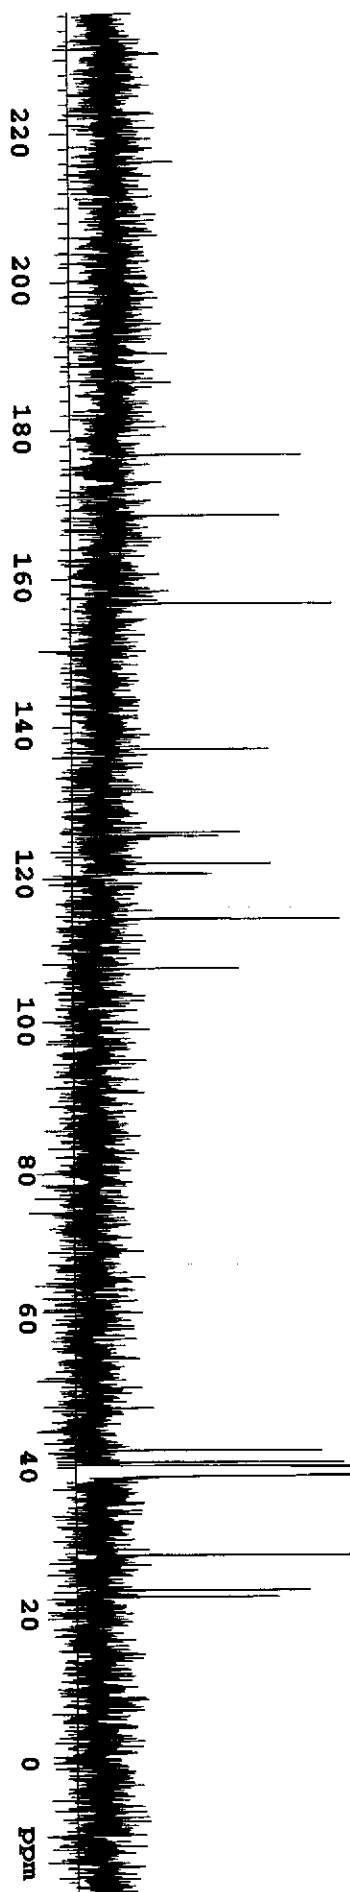

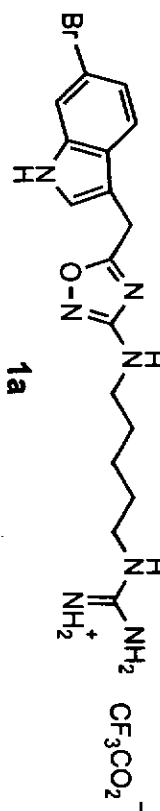

HSQC (CD<sub>3</sub>OD, 400 MHz)

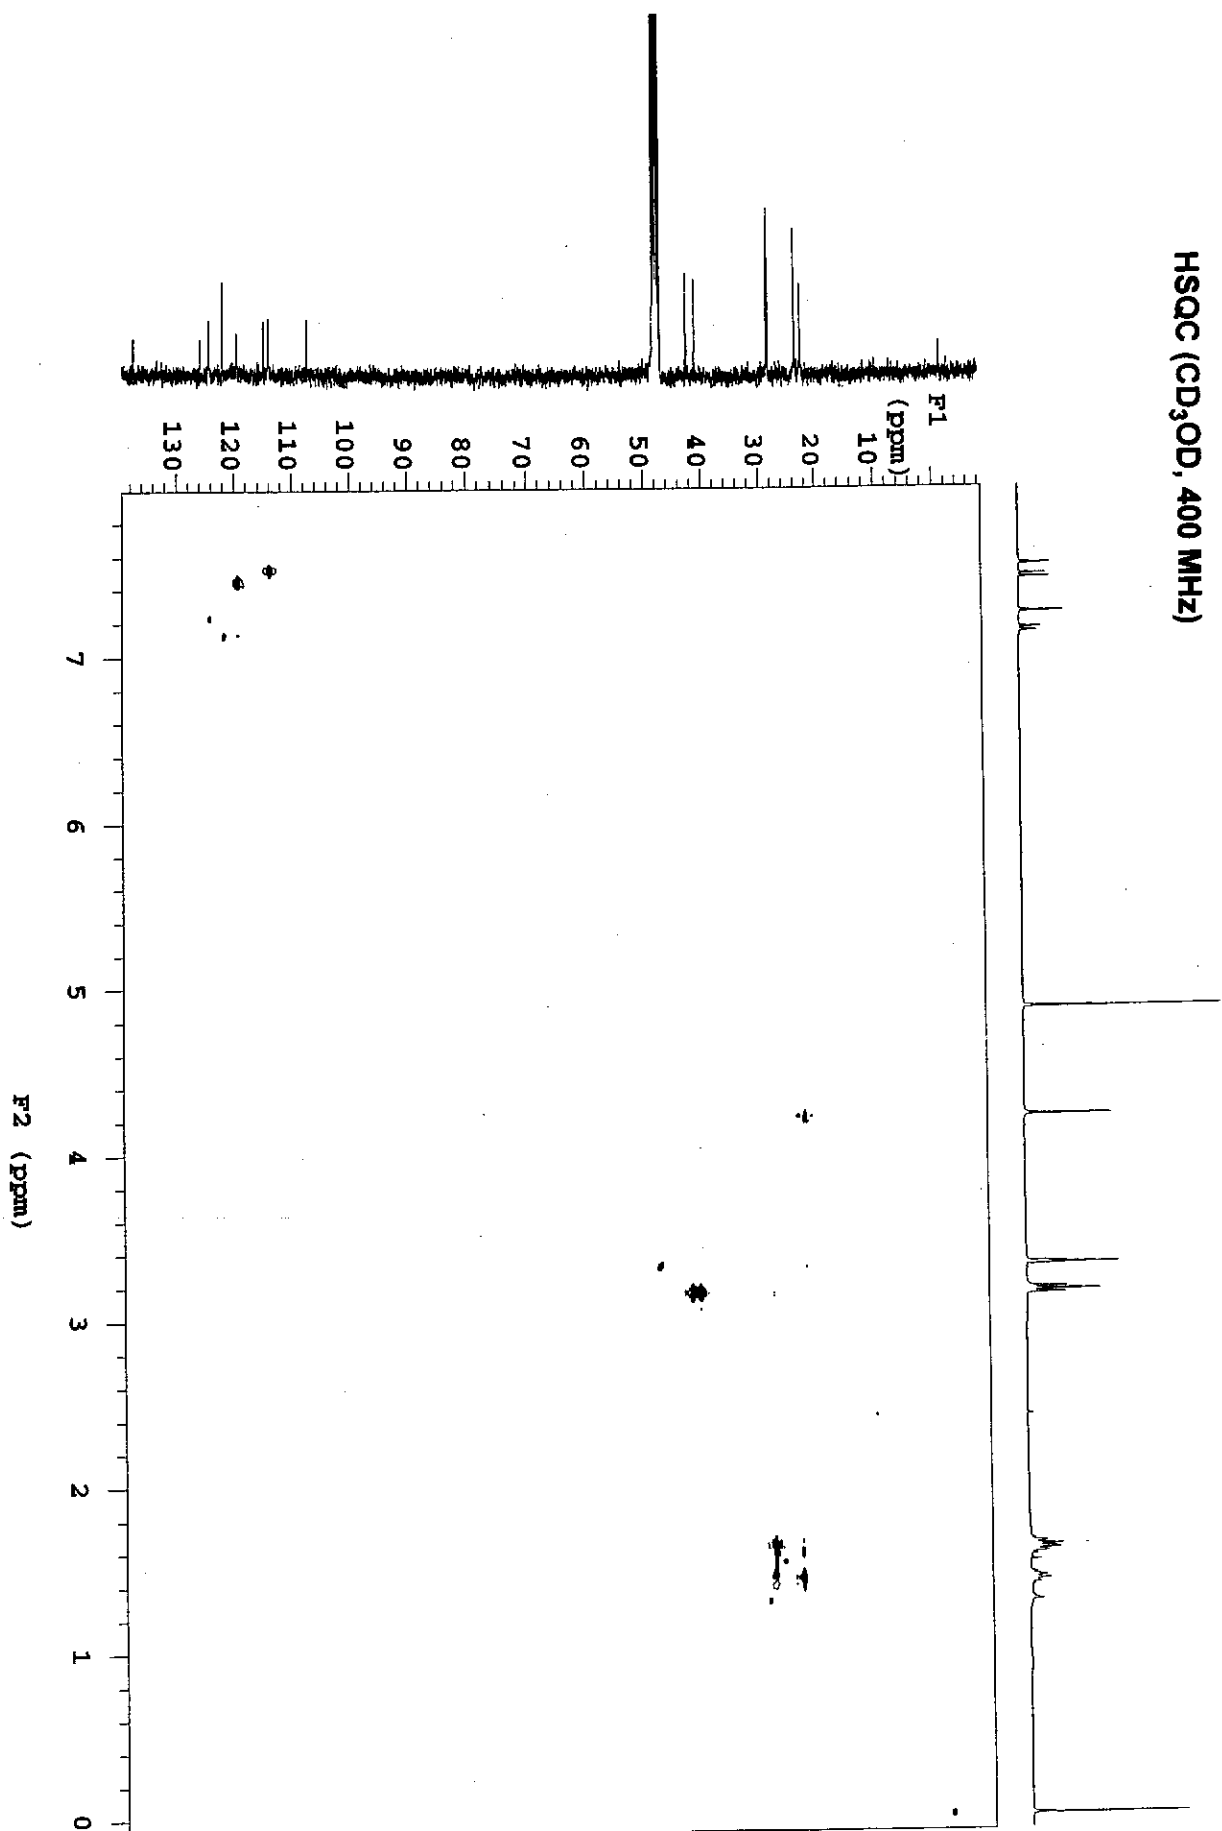

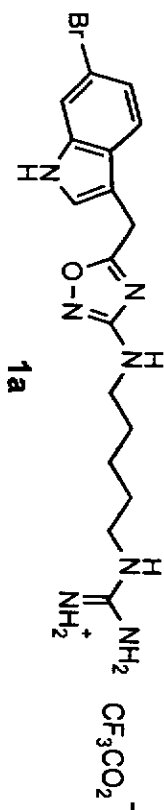

HMBC (CD<sub>3</sub>OD, 400 MHz)

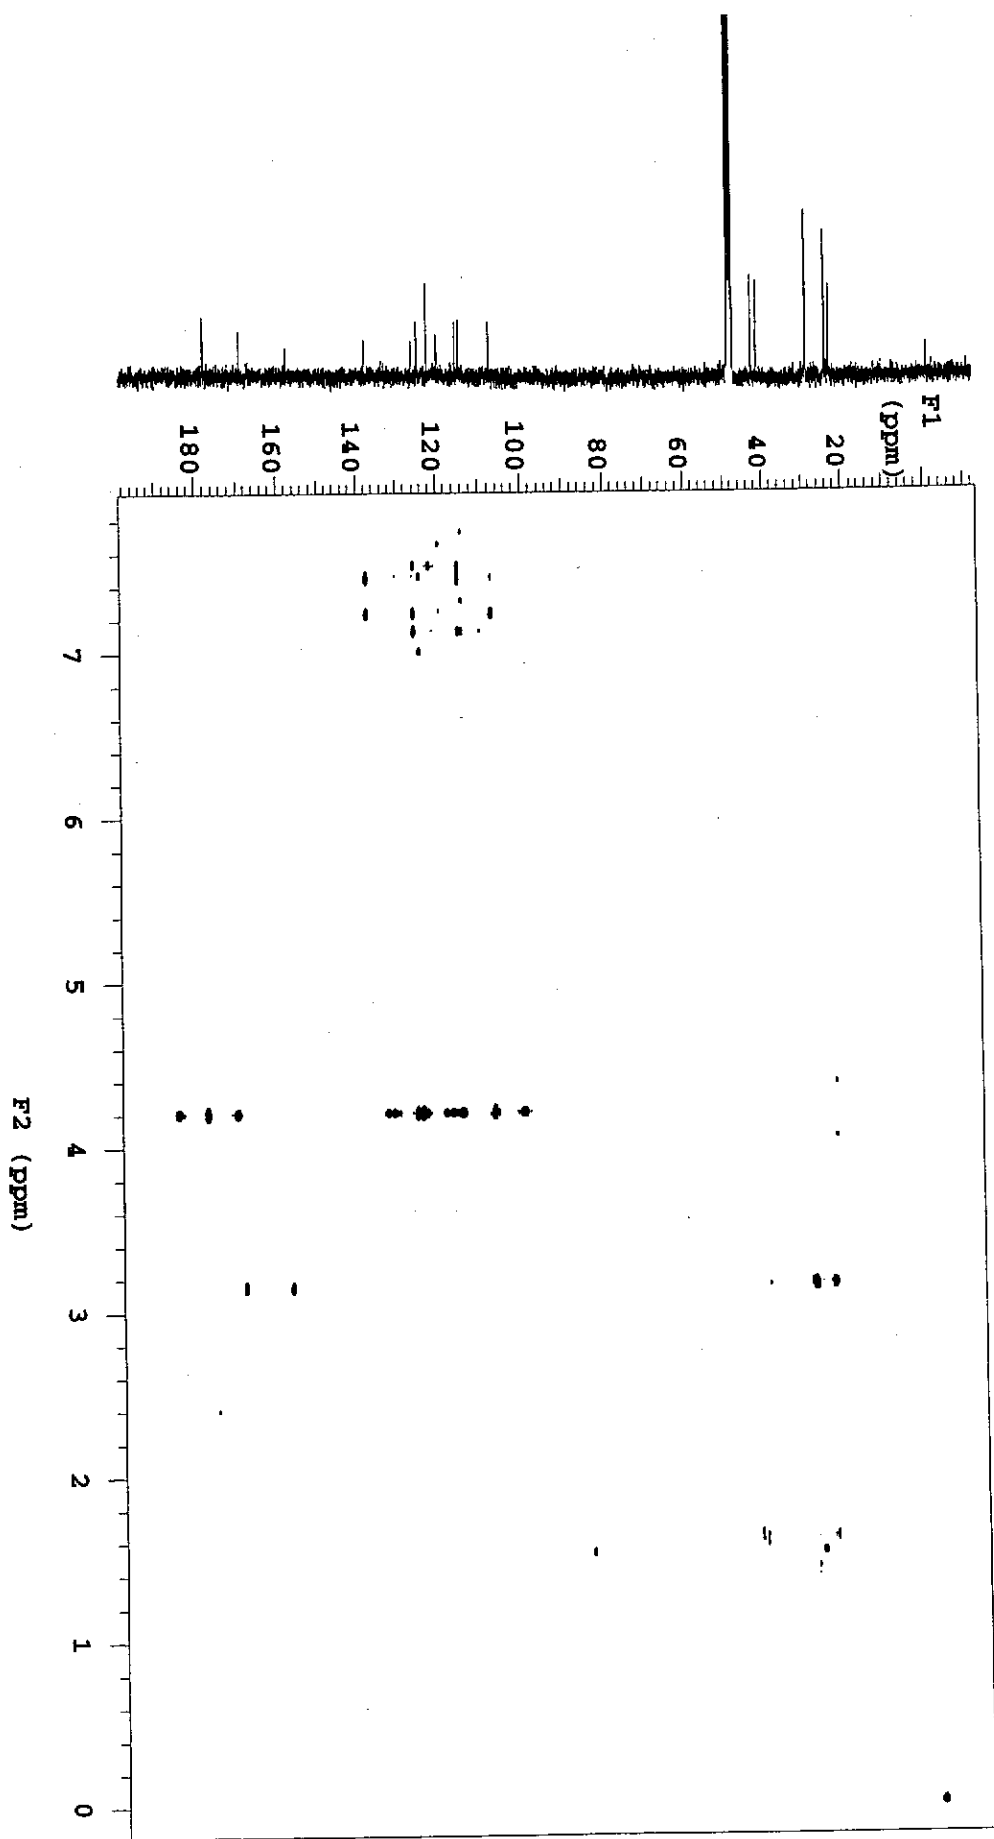

Supplement: NIHMS372952-supplement-supporting_data.pdf [file NIHMS372952-supplement-supporting_data.pdf]
